# Supplementary material for: Determinants of return at work of breast cancer patients: results from the OPTISOINS01 French prospective study
Source: PubMed Central journal article supplement — BMJ Open. 2018 May 18;8(5):e020276. doi: 10.1136/bmjopen-2017-020276 (PMC5961575; doi:10.1136/bmjopen-2017-020276), 2018-05-18
Supplement: bmjopen-2017-020276.draft_revisions.pdf [file bmjopen-2017-020276.draft_revisions.pdf]

# BMJ Open

BMJ Open is committed to open peer review. As part of this commitment we make the peer review history of every article we publish publicly available.

When an article is published we post the peer reviewers' comments and the authors' responses online. We also post the versions of the paper that were used during peer review. These are the versions that the peer review comments apply to.

The versions of the paper that follow are the versions that were submitted during the peer review process. They are not the versions of record or the final published versions. They should not be cited or distributed as the published version of this manuscript.

BMJ Open is an open access journal and the full, final, typeset and author-corrected version of record of the manuscript is available on our site with no access controls, subscription charges or pay-per-view fees (<http://bmjopen.bmj.com>).

If you have any questions on BMJ Open's open peer review process please email [info.bmjopen@bmj.com](mailto:info.bmjopen@bmj.com)

# BMJ Open

## Determinants of maintenance at work of breast cancer patients: results from the OPTISOINS01 prospective study.

|                               |                                                                                                                                                                                                                                                                                                                                                                                                                                                                                                                                |
|-------------------------------|--------------------------------------------------------------------------------------------------------------------------------------------------------------------------------------------------------------------------------------------------------------------------------------------------------------------------------------------------------------------------------------------------------------------------------------------------------------------------------------------------------------------------------|
| Journal:                      | <i>BMJ Open</i>                                                                                                                                                                                                                                                                                                                                                                                                                                                                                                                |
| Manuscript ID                 | bmjopen-2017-020276                                                                                                                                                                                                                                                                                                                                                                                                                                                                                                            |
| Article Type:                 | Research                                                                                                                                                                                                                                                                                                                                                                                                                                                                                                                       |
| Date Submitted by the Author: | 29-Oct-2017                                                                                                                                                                                                                                                                                                                                                                                                                                                                                                                    |
| Complete List of Authors:     | Arfi, Alexandra; Institut Curie, Surgery<br>Baffert, Sandrine; CEMKA-EVAL, Health Economist<br>Soilly, A-L; Universite de Bourgogne IUT Dijon-Auxerre, Health Economist<br>huchon, cyrille; Hôpital Poissy, Gynecology<br>Reyal, Fabien; Institut Curie, Surgery<br>Asselain, Bernard; Institut Curie, Biostatistics<br>Neffati, Souhir; Institut Curie, Clinical Research and Innovation<br>Department<br>Rouzier, Roman; Institut Curie, Surgery<br>Hequet, Delphine; Institut Curie-Centre René Huguenin, Surgical oncology |
| Keywords:                     | Breast tumours < ONCOLOGY, OCCUPATIONAL & INDUSTRIAL MEDICINE, PUBLIC HEALTH                                                                                                                                                                                                                                                                                                                                                                                                                                                   |
|                               |                                                                                                                                                                                                                                                                                                                                                                                                                                                                                                                                |

SCHOLARONE™  
Manuscripts

1  
2  
3 **Determinants of maintenance at work of breast cancer patients: results from the**  
4  
5 **OPTISOINS01 prospective study.**  
6

7  
8 Authors:

9  
10  
11 Alexandra Arfi<sup>1</sup>, Sandrine Baffert<sup>2</sup>, Anne-Laure Soilly<sup>3</sup>, Cyrille Huchon<sup>4,5</sup>, Fabien Reyal<sup>1,6</sup>,  
12  
13 Bernard Asselain<sup>7</sup>, Souhir Neffati<sup>8</sup>, Roman Rouzier<sup>1,9</sup>, Delphine Héquet<sup>1,9</sup>  
14  
15

16  
17 Affiliations :

18  
19 1: Department of Surgical Oncology, Institut Curie-Centre René Huguenin, 35 Rue Dailly,  
20  
21 92210 Saint-Cloud, France

22  
23 2: Health Economics, CEMKA-EVAL, Bourg-la-Reine, 43 boulevard du Maréchal-Joffre, 92340  
24  
25 Bourg-la-Reine, France

26  
27 3: Health Economics, Bourgogne Franche-Comté University, EA 7467, 2 boulevard Gabriel,  
28  
29 21000 Dijon, France

30  
31 4: Department of Obstetrics and Gynecology, Hôpital de Poissy-St Germain, 10 Rue du  
32  
33 Champ Gaillard, 78300 Poissy, France

34  
35 5: Equipe d'Accueil 7285, Risk and Safety in Clinical Medicine for Women and Perinatal  
36  
37 Health, University Versailles-Saint-Quentin, 2 av de la source de la Bièvre, 78180 Montigny-  
38  
39 le-Bretonneux, France

40  
41 6: Residual Tumor and Response to Treatment Lab, Translational Research Department,  
42  
43 Institut Curie, 75005, Paris, France

44  
45 7: Department of Biostatistics, Institut Curie-Centre René Huguenin, 35 Rue Dailly, 92210  
46  
47 Saint-Cloud, France

48  
49 8: Clinical Research and Innovation Department, Sponsorship division, Institut Curie, 92210  
50  
51 Saint-Cloud, France

1  
2  
3 9: René-Huguenin hospital, Institut Curie, Inserm U900 – Bioinformatics, biostatistics,  
4 epidemiology and computational systems. Cancer biology, 35, rue Dailly, 92210 Saint-Cloud,  
5  
6  
7 France

8  
9  
10  
11  
12 Corresponding author:

13  
14 Delphine HEQUET

15  
16 Postal address: 35 rue Dailly, 92210 St Cloud, France

17  
18 e-mail: [delphine.hequet@gmail.com](mailto:delphine.hequet@gmail.com)

19  
20 Phone number: 0033147111515

21  
22  
23  
24  
25 Word count: 2431

**Contributorship statement:**

Delphine Hequet, Roman Rouzier and Sandrine Baffert designed the study.

Bernard Asselain and Souhr Neffati contributed to the design and implementation of the research.

Sandrine Baffert and Anne-Laure Soilly performed the health economic analysis.

Alexandra Arfi and Delphine Hequet performed all the remaining statistical analysis and wrote the manuscript.

Cyrille Huchon and Fabien Reyal contributed to the clinical study, patients' inclusion and analysis of the results.

All the authors reviewed and approved the final version of the manuscript.

## ABSTRACT

**Introduction:** Return to work (RTW) after breast cancer (BC) is still a new field of research. The factors determining maintenance at work of BC patients have not been clearly identified. The aim of this study was to describe work during BC management and to identify factors associated with maintenance at work.

**Materials and methods:** An observational, prospective, multicenter study was conducted among women with operable BC. A logbook was given to all working patients to record sociodemographic and work-related data over a one-year period.

**Results:** Work-related data after BC were available for 178 patients (60%). Sick leave was prescribed for 165 patients (92.7%) for a median of 155 days. On univariate analysis, invasive BC ( $p=0.025$ ), lymph node involvement ( $p=0.005$ ), radical surgery ( $p=0.025$ ), axillary dissection ( $p=0.004$ ), chemotherapy ( $p<0.001$ ), personal income  $< \text{€}1,900/\text{month}$  ( $p=0.03$ ) and not having received the patient information booklet on RTW ( $p=0.047$ ) were associated with a longer duration of sick leave. On multivariate analysis, chemotherapy was associated with longer sick leave (OR: 3.5; [95%CI: 1.6-7.9];  $p=0.002$ ). The cost of sick leave to French National Health Insurance was fourfold higher in the case of chemotherapy ( $p<0.001$ ).

**Conclusion:** Advanced disease and chemotherapy are major factors that influence maintenance at work during the management of BC. Systematic screening can help to diagnose earlier disease and reduce the need for aggressive therapy.

**Keywords:** breast cancer, return to work, maintenance at work, absence duration, chemotherapy.

## Article summary

- This study explored prospectively maintenance and return to work during 1 year follow-up after diagnosis of breast cancer.
- The analysis is multimodal, exploring the impact of cancer on professional activity, determinants of longer sick leaves and cost of sick leaves.
- The results highlight the need to develop patients' support to improve return to work and decrease sick leaves.
- The main factor of longer sick leaves is adjuvant chemotherapy.
- section consisting of the heading: 'Strengths and limitations of this study', and containing up to five bullet points that relate specifically to the study reported

**Data sharing statement:** No additional data available

**Ethics:** This study was registered with ClinicalTrials.gov (Identifier: NCT02813317) and was approved by the French National ethics committee (CCTIRS Authorization No. 14.602 and CNIL DR-2014-167) covering research at all participating hospitals.

**Funding:** This study was supported by a grant from the French National Cancer Institute, dedicated to economic studies of innovative techniques. Delphine Hequet benefitted from a "Fondation pour la Recherche Medicale" (FDM20140630453) grant to conduct this study.

**What is already known on this subject?**

Return to work after breast cancer is a delicate step in the real-life reintegration. Breast cancer patients have difficulties at work even 5 years after the end of the treatments. The factors that maintain patients at work during breast cancer are rarely described.

**What this study adds?**

This prospective study describes work maintenance and sick leaves during the first year following the diagnosis of early breast cancer. After one year, 20% of the patients did not return to work. Chemotherapy dramatically increased the duration of sick leaves, whereas an early information on support can reduce sick leaves. Costs of sick leaves are major



## INTRODUCTION

Improvements in early detection and treatment have resulted in an increasing number of breast cancer (BC) survivors.[1] Treatments mostly focus on curing the disease and preventing metastatic relapse. About one-third of women diagnosed with BC are under the age of 55 with a 10-year survival close to 80%.[2] Many patients therefore recover and resume their activities of daily living during or after treatment, including return to work (RTW). RTW after BC is still a new, but important aspect of survivorship research, not only from a societal point of view, as it provides financial resources for rehabilitation of cancer survivors,[3,4] and contributes to psychosocial well-being, including physical and mental health.[5] Some BC cancer survivors experience reduced work ability.[6-11] Difficulties at work or unemployment differ according to the type of BC treatment. Cancer treatment varies according to the stage of the disease and can include surgery, chemotherapy, radiotherapy and hormone therapy. For many cancer patients, return to work helps them to recover from treatment and also constitutes a positive step towards the future. However, factors that maintain patients at work during treatment of their BC have not been clearly identified. The identification of these factors could help healthcare professionals to more accurately identify patients at risk of RTW difficulties in order to provide them with adapted support during BC management designed to maintain them at work. The aim of this prospective study was to describe work during BC management and identify factors associated with either cessation or maintenance at work.

## MATERIALS AND METHODS

OPTISOINS01 was an observational, prospective, multicenter study conducted from December 2014 to March 2016 among BC patients from a regional health territory. The primary objective of the Optisoins01 study was to identify the main care pathway after 1 year of early BC and to evaluate costs from various perspectives. Maintenance and return to work evaluation was one of the secondary objectives of the study. The Optisoins01 study design has been previously described.[12] Eight nonprofit hospitals participated in the study: 3 teaching hospitals, 4 general hospitals and 1 comprehensive cancer center. Inclusion criteria were: women aged  $\geq 18$  years with previously untreated, first, histologically confirmed, operable BC. Exclusion criteria were: metastatic, locally advanced, or inflammatory BC, previous history of BC.

After BC diagnosis, a work and cancer information booklet had to be given to all working patients. Our Institute has designed an information booklet in collaboration with occupational physicians and the Paris Regional Health Insurance (Caisse Régionale d'Assurance Maladie d'Île-de-France). This document includes the testimonies from employees, advice and practical information to help patients anticipate difficulties and find support: possibility of part-time work, career development plan, roles of occupational physicians and general practitioners. The booklet is freely available online with the support of the "ARC" Foundation.[13]

After inclusion, all patients were given a logbook in which to record, throughout the year, sociodemographic data, out-of-pocket health expenses and an occupational questionnaire for employed women including dates of work and absence from work during treatments, job adjustments, on-shift status and the perceived quality of reintegration. During the second half of the year, clinical research assistants made 2 phone calls to remind patients to fill in

1  
2  
3 the logbook. Types of occupations were classified according to the French *Institut National*  
4 *de la Statistique et des Etudes Economiques (INSEE)* classification.

5  
6  
7 Two groups of patients were compared in order to determine the factors associated with  
8  
9 maintenance at work: longer sick leave (longer than the median duration) and shorter sick  
10  
11 leave (shorter than the median duration). Fisher's exact test or Student's t-test were used to  
12  
13 analyze these factors. Multivariate analysis was performed using a logistic regression model.  
14  
15 Sick leave over a 1-year period was described according to whether or not the patients were  
16  
17 treated by chemotherapy. Differences in the areas under the curves of the 2 populations  
18  
19 were compared to 1,000 permutations of random allocation of chemotherapy. The same  
20  
21 analysis was performed according to whether or not the patients had received the work  
22  
23 information booklet. Differences were considered significant for  $p < 0.05$ . All statistical  
24  
25 analyses were performed with R software.[14]

26  
27  
28  
29  
30 The cost of sick leave for National Health Insurance was calculated on the basis of the  
31  
32 monthly income declared by the patients, the duration of sick leave and the national sick  
33  
34 leave allowance scale.

35  
36  
37 This study was registered with ClinicalTrials.gov (Identifier: NCT02813317) and was approved  
38  
39 by the French National ethics committee (CCTIRS Authorization No. 14.602 and CNIL DR-  
40  
41 2014-167) covering research at all participating hospitals.

## 42 43 44 45 46 **RESULTS**

47  
48 Six hundred and four patients with a median age of 58 years (range: 24-98) were included in  
49  
50 the Optisoins01 study, including 297 patients (48.2%) who were working at the time of BC  
51  
52 diagnosis. The present study focused on these 297 patients.

Detailed patient characteristics and cancer characteristics are presented in Table 1. The median age of the women was 50 (range: 37-77) years, 54 women (18.2%) were single, 153 (51.5%) were married, 39 (13.1%) were divorced and 3 (1.0%) were widows. Two hundred and sixty-one patients (87.9%) had invasive BC and 35 (11.8%) had *in situ* BC. Seventy-five women (25.3%) presented axillary lymph node involvement.

Table 1: Patient and cancer characteristics and breast cancer treatments (n=297)

|                                      | n or median | % or range |
|--------------------------------------|-------------|------------|
| <b>Patient characteristics</b>       |             |            |
| Age (years)                          | 50          | (27-77)    |
| Marital status                       |             |            |
| <i>Single</i>                        | 54          | 18.2%      |
| <i>Married</i>                       | 153         | 51.5%      |
| <i>Divorced</i>                      | 39          | 13.1%      |
| <i>Widow</i>                         | 3           | 1%         |
| <i>NA</i>                            | 48          | 16.2%      |
| <b>Breast cancer characteristics</b> |             |            |
| Modes of diagnosis                   |             |            |
| <i>Organized screening</i>           | 60          | 20.2%      |
| <i>Individual screening</i>          | 114         | 38.4%      |
| <i>Clinical signs</i>                | 123         | 41.4%      |
| Type of cancer                       |             |            |
| <i>Invasive</i>                      | 261         | 87.9%      |
| <i>In situ</i>                       | 35          | 11.8%      |
| <i>NA</i>                            | 1           | 0.3%       |
| Lymph node involvement               |             |            |
| <i>Yes</i>                           | 75          | 25.3%      |
| <i>No</i>                            | 222         | 74.7%      |
| <b>Surgery</b>                       |             |            |
| Breast surgery                       |             |            |
| <i>Conservative</i>                  | 220         | 74.1%      |
| <i>Radical</i>                       | 77          | 25.9%      |
| Lymph node surgery                   |             |            |
| <i>Sentinel lymph node procedure</i> | 203         | 68.4%      |
| <i>Axillary dissection</i>           | 72          | 24.2%      |

|                           |                             |     |       |
|---------------------------|-----------------------------|-----|-------|
|                           | <i>NA</i>                   | 22  | 7.4%  |
| Surgical revision         | <i>no</i>                   | 227 | 76.4% |
|                           | <i>1</i>                    | 60  | 20.2% |
|                           | <i>&gt;1</i>                | 10  | 3.4%  |
| Type of hospitalization   |                             |     |       |
|                           | <i>Outpatient surgery</i>   | 107 | 36%   |
|                           | <i>Conventional surgery</i> | 190 | 64%   |
| <b>Adjuvant therapies</b> |                             |     |       |
| Radiotherapy              |                             |     |       |
|                           | <i>No</i>                   | 27  | 9.1%  |
|                           | <i>Yes</i>                  | 270 | 90.9% |
| Chemotherapy              |                             |     |       |
|                           | <i>Yes</i>                  | 143 | 48.1% |
|                           | <i>No</i>                   | 154 | 51.9% |
| Trastuzumab               |                             |     |       |
|                           | <i>Yes</i>                  | 36  | 12.1% |
|                           | <i>No</i>                   | 100 | 33.7% |
|                           | <i>NA</i>                   | 161 | 54.2% |
| Hormone therapy           |                             |     |       |
|                           | <i>Yes</i>                  | 220 | 74.1% |
|                           | <i>No</i>                   | 77  | 25.9% |

Two hundred and twenty women (74.1%) underwent breast-conserving surgery and 77 (25.9%) underwent radical mastectomy (Table 1). A sentinel lymph node procedure was performed for 203 patients (68.4%). Seventy patients required at least 1 reoperation for the following reasons: positive surgical margins and secondary mastectomy, sentinel lymph node procedure following discovery of an invasive tumor, axillary dissection following positive sentinel lymph node biopsy and surgical complications (abscess, hematoma, etc.). After surgery, 90.9% of patients received radiotherapy 48.1% of patients received adjuvant chemotherapy and 74.1% of patients received hormone therapy.

Most patients were executives (31.4%) or employees (33.3%). Most patients (47.1%) had a monthly income > €1,900. Work data after BC were available for 178 patients (60%,

supplemental Figure 1). Patients who did not complete the 1-year work questionnaire were globally less compliant with the study and less medicalized (supplemental table 1). Sick leave was prescribed for 165 patients (92.7%). Patients had only one sick leave in 52.2% of cases, 2 sick leaves in 21.9% of cases and 3 or more sick leaves in 18.5% of cases. Median duration of sick leave was 155 days (range: 5-365). After treatment, 7 patients (3.9%) lost their jobs and 46.1% had reduced income. Patients encountered difficulties with their co-workers in 3.4% of cases, with their superiors in 3.9% of cases and for undocumented reasons in 12.9% of cases. Work-related factors are summarized in Table 2.

Table 2: Work characteristics before and after BC

|                                                         | n or median | % or range |
|---------------------------------------------------------|-------------|------------|
| <b>Work characteristics before breast cancer, n=297</b> |             |            |
| Type of occupation                                      |             |            |
| <i>Farmer</i>                                           | 1           | 0.3%       |
| <i>Self-employed</i>                                    | 8           | 2.5%       |
| <i>Executive</i>                                        | 99          | 31.4%      |
| <i>Employee</i>                                         | 105         | 33.3%      |
| <i>Intermediate profession</i>                          | 29          | 9.2%       |
| <i>Blue-collar worker</i>                               | 2           | 0.6%       |
| NA                                                      | 53          | 22.9%      |
| Personal income per month (€)                           |             |            |
| <i>no income</i>                                        | 6           | 2%         |
| <i>&lt; 1900</i>                                        | 104         | 35%        |
| <i>&gt;1900</i>                                         | 140         | 47.1%      |
| NA                                                      | 47          | 15.8%      |
| <b>Work characteristics after breast cancer, n=178</b>  |             |            |
| Dismissal                                               | 7           | 3.9%       |
| Income change                                           |             |            |
| <i>decreased</i>                                        | 82          | 46.1%      |
| <i>increased</i>                                        | 3           | 1.7%       |
| <i>stable</i>                                           | 73          | 41%        |
| NA                                                      | 20          | 11.2%      |
| Decreased income (%), n=82                              |             |            |
| <i>&lt;10%</i>                                          | 37          | 45.1%      |
| <i>10-30%</i>                                           | 13          | 15.8%      |

|                               |                |     |         |
|-------------------------------|----------------|-----|---------|
|                               | 30-60%         | 5   | 6.1%    |
|                               | >60%           | 3   | 3.7%    |
|                               | NA             | 24  | 29.3%   |
| Sick leave                    |                |     |         |
|                               | Yes            | 165 | 92.7%   |
|                               | No             | 13  | 7.3%    |
| Number of sick leaves         |                |     |         |
|                               | 1              | 93  | 52.2%   |
|                               | 2              | 39  | 21.9%   |
|                               | >2             | 33  | 18.5%   |
| Duration of sick leave (days) |                | 155 | (5-365) |
| Difficulties at work          |                |     |         |
|                               | with coworkers | 6   | 3.4%    |
|                               | with superiors | 7   | 3.9%    |
|                               | other          | 23  | 12.9%   |

On univariate analysis, the presence of clinical signs leading to a diagnosis of BC ( $p<0.001$ ), an invasive form of BC ( $p=0.02$ ), lymph node involvement ( $p=0.005$ ), radical surgery ( $p=0.02$ ), axillary dissection ( $p<0.001$ ), chemotherapy ( $p<0.001$ ), personal income  $< \text{€}1,900/\text{month}$  ( $p=0.03$ ) and not having received the work and cancer information booklet ( $p=0.047$ ) were associated with a longer total duration of sick leave (Table 3). Moreover, patients with longer sick leave were more likely to have reduced income after treatment of their disease ( $p=0.0012$ ).

Table 3: Determinants and consequences of long sick leave

|                                | Sick leave <155 days, n=79 |            | Sick leave >155, days n=77 |            | p    |
|--------------------------------|----------------------------|------------|----------------------------|------------|------|
|                                | n or median                | % or range | n or median                | % or range |      |
| <b>Patient characteristics</b> |                            |            |                            |            |      |
| Age (years)                    | 50.6                       | (27-59)    | 50                         | (29-77)    | 0.52 |
| Type of occupation             |                            |            |                            |            | 0.09 |
|                                | <i>Farmer</i>              | 0          | 0%                         | 0          | 0%   |

|                                      |                                      |    |       |    |       |                  |
|--------------------------------------|--------------------------------------|----|-------|----|-------|------------------|
|                                      | <i>Self-employed</i>                 | 3  | 3.8%  | 1  | 1.3%  |                  |
|                                      | <i>Executive</i>                     | 36 | 45.6% | 29 | 37.7% |                  |
|                                      | <i>Employee</i>                      | 25 | 31.6% | 38 | 49.4% |                  |
|                                      | <i>Intermediate profession</i>       | 13 | 16.5% | 7  | 9.1%  |                  |
|                                      | <i>Blue-collar worker</i>            | 1  | 1.3%  | 0  | 0%    |                  |
|                                      | NA                                   | 1  | 1.3%  | 2  |       |                  |
|                                      | Personal income per month (€)        |    |       |    |       | <b>0.03</b>      |
|                                      | < 1900                               | 25 | 31.6% | 37 | 48.1% |                  |
|                                      | > 1900                               | 54 | 68.4% | 38 | 49.4% |                  |
|                                      | NA                                   | 0  | 0%    | 2  | 2.6%  |                  |
| Marital status                       |                                      |    |       |    |       | 0.76             |
|                                      | <i>Single</i>                        | 18 | 22.8% | 12 | 15.6% |                  |
|                                      | <i>Married</i>                       | 47 | 59.5% | 49 | 63.6% |                  |
|                                      | <i>Divorced</i>                      | 12 | 15.2% | 14 | 18.2% |                  |
|                                      | <i>Widow</i>                         | 1  | 1.3%  | 1  | 1.3%  |                  |
|                                      | NA                                   | 1  | 1.3%  | 1  | 1.3%  |                  |
| <b>Breast cancer characteristics</b> |                                      |    |       |    |       |                  |
| Type of cancer                       |                                      |    |       |    |       | <b>&lt;0.001</b> |
|                                      | <i>Invasive</i>                      | 63 | 79.7% | 74 | 96.1% |                  |
|                                      | <i>In situ</i>                       | 16 | 20.3% | 3  | 3.9%  |                  |
| Lymph node involvement               |                                      |    |       |    |       | <b>0.005</b>     |
|                                      | <i>Yes</i>                           | 11 | 13.9% | 26 | 33.8% |                  |
|                                      | <i>No</i>                            | 68 | 86.1% | 52 | 67.5% |                  |
| <b>Surgery</b>                       |                                      |    |       |    |       |                  |
| Breast surgery                       |                                      |    |       |    |       | <b>0.02</b>      |
|                                      | <i>Conservative</i>                  | 66 | 83.5% | 50 | 64.9% |                  |
|                                      | <i>Radical</i>                       | 13 | 16.5% | 27 | 35.1% |                  |
| Lymph node surgery                   |                                      |    |       |    |       | <b>&lt;0.001</b> |
|                                      | <i>Sentinel lymph node procedure</i> | 62 | 78.5% | 48 | 62.3% |                  |
|                                      | <i>Axillary dissection</i>           | 9  | 11.4% | 26 | 33.8% |                  |
|                                      | NA                                   | 8  | 10.1% | 3  | 3.9%  |                  |
| Surgical revision                    |                                      |    |       |    |       | 0.06             |
|                                      | <i>Yes</i>                           | 13 | 16.5% | 23 | 29.9% |                  |
|                                      | <i>No</i>                            | 66 | 83.5% | 54 | 70.1% |                  |
| Radiotherapy                         |                                      |    |       |    |       | 0.53             |
|                                      | <i>Yes</i>                           | 72 | 91.1% | 74 | 96.1% |                  |
|                                      | <i>No</i>                            | 7  | 8.9%  | 3  | 3.9%  |                  |
| Chemotherapy                         |                                      |    |       |    |       | <b>&lt;0.001</b> |
|                                      | <i>Yes</i>                           | 25 | 31.6% | 56 | 72.7% |                  |
|                                      | <i>No</i>                            | 54 | 68.4% | 21 | 27.3% |                  |



|    |                                                                                              |                             |    |       |    |       |                  |
|----|----------------------------------------------------------------------------------------------|-----------------------------|----|-------|----|-------|------------------|
| 1  |                                                                                              |                             |    |       |    |       |                  |
| 2  |                                                                                              |                             |    |       |    |       |                  |
| 3  | Trastuzumab                                                                                  |                             |    |       |    |       | 0.54             |
| 4  |                                                                                              | Yes                         | 9  | 11.4% | 12 | 15.6% |                  |
| 5  |                                                                                              | No                          | 16 | 20.3% | 40 | 51.9% |                  |
| 6  |                                                                                              | NA                          | 54 | 68.4% | 25 | 32.5% |                  |
| 7  |                                                                                              |                             |    |       |    |       |                  |
| 8  | Hormone therapy                                                                              |                             |    |       |    |       | 0.05             |
| 9  |                                                                                              | Yes                         | 50 | 63.3% | 61 | 79.2% |                  |
| 10 |                                                                                              | No                          | 29 | 36.7% | 16 | 20.8% |                  |
| 11 |                                                                                              |                             |    |       |    |       |                  |
| 12 | <b>Patient management</b>                                                                    |                             |    |       |    |       |                  |
| 13 | Modes of diagnosis                                                                           |                             |    |       |    |       | <b>&lt;0.001</b> |
| 14 |                                                                                              | <i>Organized screening</i>  | 15 | 19%   | 21 | 27.3% |                  |
| 15 |                                                                                              | <i>Individual screening</i> | 43 | 54.4% | 20 | 26%   |                  |
| 16 |                                                                                              | <i>Clinical signs</i>       | 21 | 26.6% | 36 | 46.8% |                  |
| 17 |                                                                                              |                             |    |       |    |       |                  |
| 18 | Type of hospitalization                                                                      |                             |    |       |    |       | <b>&lt;0.001</b> |
| 19 |                                                                                              | <i>Outpatient surgery</i>   | 58 | 73.4% | 34 | 44.2% |                  |
| 20 |                                                                                              | <i>Inpatient surgery</i>    | 21 | 26.6% | 43 | 55.8% |                  |
| 21 |                                                                                              |                             |    |       |    |       |                  |
| 22 | Work and cancer information booklet                                                          |                             |    |       |    |       |                  |
| 23 |                                                                                              | Yes                         | 64 | 81%   | 52 | 67.5% | <b>0.047</b>     |
| 24 |                                                                                              | No                          | 15 | 19%   | 25 | 32.5% |                  |
| 25 |                                                                                              |                             |    |       |    |       |                  |
| 26 | <b>Return to work</b>                                                                        |                             |    |       |    |       |                  |
| 27 |                                                                                              |                             |    |       |    |       |                  |
| 28 | Dismissal                                                                                    |                             | 1  | 1.3%  | 3  | 3.9%  | 0.62             |
| 29 | Income change                                                                                |                             |    |       |    |       |                  |
| 30 |                                                                                              | <i>decreased</i>            | 23 | 29.1% | 48 | 62.3% | <b>&lt;0.001</b> |
| 31 |                                                                                              | <i>increased</i>            | 0  | 0%    | 2  | 2.6%  |                  |
| 32 |                                                                                              | <i>stable</i>               | 37 | 46.8% | 24 | 31.2% |                  |
| 33 |                                                                                              | NA                          | 19 | 24.1% | 3  | 3.9%  |                  |
| 34 |                                                                                              |                             |    |       |    |       |                  |
| 35 | Decreased income (%)                                                                         |                             |    |       |    |       | 0.61             |
| 36 |                                                                                              | <10%                        | 11 | 13.9% | 21 | 27.3% |                  |
| 37 |                                                                                              | 10-30%                      | 4  | 5.1%  | 7  | 9.1%  |                  |
| 38 |                                                                                              | 30-60%                      | 0  | 0%    | 4  | 5.2%  |                  |
| 39 |                                                                                              | >60%                        | 0  | 0%    | 3  | 3.9%  |                  |
| 40 |                                                                                              | NA                          | 64 | 81%   | 42 | 54.5% |                  |
| 41 |                                                                                              |                             |    |       |    |       |                  |
| 42 | Difficulties at work                                                                         |                             |    |       |    |       |                  |
| 43 |                                                                                              | <i>with coworkers</i>       | 2  | 2.5%  | 3  | 3.9%  | 0.67             |
| 44 |                                                                                              | <i>with superiors</i>       | 0  | 0%    | 6  | 7.8%  | 0.17             |
| 45 |                                                                                              | <i>other</i>                | 7  | 8.9%  | 14 | 18.2% | 0.93             |
| 46 |                                                                                              |                             |    |       |    |       |                  |
| 47 |                                                                                              |                             |    |       |    |       |                  |
| 48 |                                                                                              |                             |    |       |    |       |                  |
| 49 |                                                                                              |                             |    |       |    |       |                  |
| 50 |                                                                                              |                             |    |       |    |       |                  |
| 51 |                                                                                              |                             |    |       |    |       |                  |
| 52 |                                                                                              |                             |    |       |    |       |                  |
| 53 |                                                                                              |                             |    |       |    |       |                  |
| 54 | On multivariate analysis, chemotherapy was the only independent factor associated with       |                             |    |       |    |       |                  |
| 55 | longer sick leave (OR: 3.5, [95%CI: 1.6-7.9], p=0.002). Patients treated by chemotherapy had |                             |    |       |    |       |                  |
| 56 |                                                                                              |                             |    |       |    |       |                  |
| 57 |                                                                                              |                             |    |       |    |       |                  |
| 58 |                                                                                              |                             |    |       |    |       |                  |
| 59 |                                                                                              |                             |    |       |    |       |                  |
| 60 |                                                                                              |                             |    |       |    |       |                  |

1  
2  
3 longer sick leave than those not treated by chemotherapy (Figure 1). The difference in terms  
4  
5 of the 1-year distribution of sick leave was not statistically significant between patients  
6  
7 according to whether or not they had received the work information booklet (Figure 2). The  
8  
9 cost of sick leave for National Health Insurance was fourfold higher in patients treated by  
10  
11 chemotherapy with a median allowance of €8,841.  
12  
13  
14  
15

## 16 **DISCUSSION**

17  
18 This study confirms that RTW after BC is a difficult process. Sick leave is frequently  
19  
20 prescribed and is often long, with a median sick leave of 155 days in this study.  
21  
22  
23

24 Factors associated with long sick leave (>155 days) were severe or advanced forms of BC.  
25  
26 The duration of sick leave was also associated with the mode of diagnosis, as patients  
27  
28 diagnosed by breast screening presented shorter sick leaves. Public health authorities should  
29  
30 therefore promote breast screening in order to decrease the proportion of advanced forms  
31  
32 of BC and aggressive therapies with severe consequences on work and personal activities.  
33  
34 Consequently, longer sick leave was also associated with more aggressive therapy, such as  
35  
36 radical surgery, axillary dissection, and chemotherapy. These results are similar to those  
37  
38 published in the literature.[6,10,11, 15-17] Chemotherapy is an aggressive treatment that is  
39  
40 necessary in order to ensure survival, but which has long-lasting consequences in terms of  
41  
42 self-esteem (alopecia...), chronic pain (neuropathy...), and chronic fatigue, that play an  
43  
44 important role in return to work and maintenance at work.[9] BC survivors may have to deal  
45  
46 with the side effects specific to this type of treatment. Although many side effects of  
47  
48 chemotherapy are only temporary,[18] some studies have shown that chemotherapy may  
49  
50 impact on cognitive functioning [19] and fatigue [20] up to 10 years after diagnosis.  
51  
52  
53  
54  
55  
56  
57  
58  
59  
60

1  
2  
3 Cognitive functioning and fatigue have both been associated with impaired work  
4  
5 functioning.[21] Munir et al [22] reported that up to 62–84% of women resumed work either  
6  
7 during treatment with chemotherapy or following completion of treatment. As a result of  
8  
9 their cognitive limitations, women reported that they experienced difficulties with their  
10  
11 work ability, particularly difficulties doing multiple tasks, reduced clarity of decisions, deficits  
12  
13 in clear thinking and feelings of being inept due to short-term memory.[15] Rapid progress is  
14  
15 being made in the field of chemotherapy with the routine use of new genomic signature  
16  
17 tests that allow more accurate targeting of patient likely to benefit from chemotherapy.  
18  
19 According to Nesvold et al [23] and Eaker et al,[18] mastectomy and axillary lymph node  
20  
21 dissection may influence working life long after treatment due to an increased risk of chronic  
22  
23 pain. BC survivors are more likely to suffer from upper extremity impairments or  
24  
25 lymphedema than are other cancer survivors,[24-28] which are responsible for difficulties  
26  
27 returning to work or maintenance at work.[27,29-31]

28  
29  
30  
31  
32  
33 The work and cancer information booklet appeared to help patients return to work with  
34  
35 significantly shorter sick leave. The first key to successful return to work is anticipation. The  
36  
37 information booklet advises women to attend the occupational medicine service. In France,  
38  
39 occupational medicine plays an essential role, but the patient is not obliged to consult the  
40  
41 occupational physician when sick leave is < 3 months. However, at 3 months, the  
42  
43 occupational physician and the employee must determine the modalities of return to work,  
44  
45 based on the employee's state of health and the characteristics of the workplace. These  
46  
47 arrangements concern the employee himself and the work collective with, if necessary,  
48  
49 actions so that the reception is assured to the return. Setting up of a schedule, reduction of  
50  
51 working hours, modification of physical, mental or workplace loads can also be instituted at  
52  
53  
54  
55  
56  
57  
58  
59  
60

1  
2  
3 the time of return to work. The occupational physician can provide recommendations to the  
4  
5 employer, unless the employer refuses. The results obtained with this handbook are  
6  
7 particularly encouraging and suggest that more individual supports should be developed.  
8  
9 Patient support appears to be one of the keys to successful RTW. Health coaching by  
10  
11 telephone and/or face-to-face interview have already been tested,[30,32,33] showing  
12  
13 positive significant outcomes on physical activity, body mass index, pain management,  
14  
15 acceptance of disease and self-confidence among cancer survivors. Coaching methods have  
16  
17 never been tested in the management of work maintenance. Our Institute is therefore  
18  
19 setting up a prospective randomized study (OPTICOACH) with tailored support intervention  
20  
21 to enhance RTW after BC in collaboration with a professional coach, consisting of individual  
22  
23 interviews or small group workshops over a period of 3 years.  
24  
25  
26

27  
28 Difficulties returning to work appear to extend over a period of many years. Sevellec et al  
29  
30 [34] showed that, six years after returning to work, one employee out of two was still  
31  
32 working in the same company. Rather than disappearing, the difficulties identified many  
33  
34 years after BC persist for a long time after stopping treatment. It is therefore essential to  
35  
36 identify the factors associated with longer sick leave and RTW difficulties in order to help  
37  
38 working patients and prevent these long-term problems. The VICAN 2 study focused on  
39  
40 the factors associated to difficulties at RTW.[33] This large study was carried out in 2014  
41  
42 by the French National Cancer Institute, on the living conditions of people with cancer (not  
43  
44 only BC), two years after the diagnosis. The people most vulnerable to job loss two years  
45  
46 after the cancer diagnosis are mainly those working in the so-called socio-professional  
47  
48 execution categories, the youngest and oldest, married people with a level of education  
49  
50 below the baccalaureate level, and those with precarious contracts.  
51  
52  
53  
54  
55  
56  
57  
58  
59  
60

1  
2  
3 One of the potential biases of this study concerns the characteristics of the study  
4  
5 population, as almost the majority of women belonged to the wealthiest social classes, as  
6  
7 45.6% of patients were executives and only 1.3% were blue collar workers. More than  
8  
9 sixty-eight percent of patients had a personal monthly income > €1,900 and 36.7% had a  
10  
11 personal monthly income > €2,600. This distribution does not exactly reflect French  
12  
13 society; in France, according to the INSEE statistics of 2014, the median monthly income  
14  
15 was €1,772. Similarly to our results, a Canadian team [34] has shown that women with an  
16  
17 annual income less than C\$20,000 were less likely to return to work than those whose  
18  
19 income exceeded C\$50,000. The French social protection system also plays a role, as it  
20  
21 provides cancer survivors with the possibility of replacement income, allowing women to  
22  
23 decide whether or not they wish to return to work immediately. Moreover, BC almost  
24  
25 exclusively concerns women, affecting them in their roles as mother, wife and working  
26  
27 woman; after treatment, some women sometimes prefer to devote themselves more to  
28  
29 their personal life and therefore decide to stop working. This notion of changing priorities  
30  
31 has already been reported. [35,36] After reassessing their priorities, some women choose  
32  
33 to lower their career ambitions and devote more time to their family and themselves.  
34  
35 However, this attitude would particularly concern patients with other sources of income.  
36  
37 Providing assistance and support to all working patients should therefore be a priority.  
38  
39  
40  
41  
42  
43  
44  
45

## 46 **CONCLUSION**

47  
48 Advanced disease and chemotherapy are major factors that influence maintenance at work.  
49  
50 Systematic screening or use of innovative tools, such as genomic signatures, can facilitate  
51  
52 earlier diagnosis and reduce aggressive therapies. One of the keys to success of RTW is  
53  
54 anticipation; a cancer and work information booklet given to the patient during treatment,  
55  
56  
57  
58  
59

1  
2  
3 together with strong support by the occupational medicine service appear promote return  
4  
5 to work and maintenance at work. Personalized coaching methods have been successfully  
6  
7 used to promote acceptance of disease and self-confidence and should be tested in the  
8  
9 management of maintenance at work.  
10  
11  
12  
13  
14  
15  
16  
17  
18  
19  
20  
21  
22  
23  
24  
25  
26  
27  
28  
29  
30  
31  
32  
33  
34  
35  
36  
37  
38  
39  
40  
41  
42  
43  
44  
45  
46  
47  
48  
49  
50  
51  
52  
53  
54  
55  
56  
57  
58  
59  
60

For peer review only

Supplemental Table 1: Differences between patients who returned the 1-year questionnaire and patients who did not return the questionnaire

|                                      | Data on sick leave, n=178      |            | No data on sick leave, n=70 |            | p               |
|--------------------------------------|--------------------------------|------------|-----------------------------|------------|-----------------|
|                                      | n or median                    | % or range | n or median                 | % or range |                 |
| <b>Patient characteristics</b>       |                                |            |                             |            |                 |
| Age (years)                          | 50                             | (29-67)    | 49                          | (27-77)    | 0.36            |
| Type of occupation                   |                                |            |                             |            | <b>&lt;0.05</b> |
|                                      | <i>Farmer</i>                  | 1          | 1%                          | 0          | 0%              |
|                                      | <i>Self-employed</i>           | 5          | 3%                          | 0          | 0%              |
|                                      | <i>Executive</i>               | 72         | 40%                         | 3          | 4%              |
|                                      | <i>Employee</i>                | 72         | 40%                         | 27         | 39%             |
|                                      | <i>Intermediate profession</i> | 22         | 12%                         | 33         | 47%             |
|                                      | <i>Blue-collar worker</i>      | 2          | 1%                          | 7          | 10%             |
|                                      | <i>NA</i>                      | 4          | 2%                          | 0          | 0%              |
| Personal income per month (€)        |                                |            |                             |            | <b>&lt;0.05</b> |
|                                      | <1900                          | 71         | 40%                         | 20         | 29%             |
|                                      | >1900                          | 103        | 58%                         | 37         | 53%             |
|                                      | <i>NA</i>                      | 4          | 2%                          | 13         | 19%             |
| Marital status                       |                                |            |                             |            | <b>&lt;0.05</b> |
|                                      | <i>Single</i>                  | 34         | 19%                         | 18         | 26%             |
|                                      | <i>Married</i>                 | 110        | 62%                         | 39         | 56%             |
|                                      | <i>Divorced</i>                | 29         | 16%                         | 10         | 14%             |
|                                      | <i>Widow</i>                   | 2          | 1%                          | 1          | 1%              |
|                                      | <i>NA</i>                      | 3          | 2%                          | 2          | 3%              |
| <b>Breast cancer characteristics</b> |                                |            |                             |            |                 |
| Type of cancer                       |                                |            |                             |            | 0.32            |
|                                      | <i>Invasive</i>                | 156        | 87,6%                       | 61         | 87%             |
|                                      | <i>In situ</i>                 | 21         | 11,8%                       | 9          | 13%             |
| Lymph node involvement               |                                |            |                             |            | 0.12            |
|                                      | <i>Yes</i>                     | 43         | 24%                         | 23         | 33%             |
|                                      | <i>No</i>                      | 135        | 76%                         | 47         | 67%             |
| <b>Surgical patient care</b>         |                                |            |                             |            |                 |
| Breast surgery                       |                                |            |                             |            | <b>&lt;0.05</b> |
|                                      | <i>Conservative</i>            | 133        | 75%                         | 46         | 66%             |
|                                      | <i>Radical</i>                 | 45         | 25%                         | 24         | 34%             |
| Lymph node surgery                   |                                |            |                             |            | 0.48            |

|  |                                      |     |     |    |     |       |
|--|--------------------------------------|-----|-----|----|-----|-------|
|  | <i>Sentinel lymph node procedure</i> | 122 | 69% | 40 | 57% |       |
|  | <i>Axillary dissection</i>           | 42  | 24% | 24 | 34% |       |
|  | <i>NA</i>                            | 14  | 8%  | 6  | 9%  |       |
|  | Surgical revision                    |     |     |    |     | 0.24  |
|  | <i>Yes</i>                           | 43  | 24% | 16 | 23% |       |
|  | <i>No</i>                            | 135 | 76% | 54 | 77% |       |
|  | Radiotherapy                         |     |     |    |     | <0.05 |
|  | <i>Yes</i>                           | 167 | 94% | 61 | 87% |       |
|  | <i>No</i>                            | 11  | 6%  | 9  | 13% |       |
|  | Chemotherapy                         |     |     |    |     | <0.05 |
|  | <i>Yes</i>                           | 92  | 52% | 33 | 47% |       |
|  | <i>No</i>                            | 86  | 48% | 37 | 53% |       |
|  | Trastuzumab                          |     |     |    |     | 0.42  |
|  | <i>Yes</i>                           | 24  | 13% | 9  | 13% |       |
|  | <i>No</i>                            | 63  | 35% | 22 | 31% |       |
|  | <i>NA</i>                            | 91  | 51% | 39 | 56% |       |
|  | Hormone therapy                      |     |     |    |     | 0.69  |
|  | <i>Yes</i>                           | 129 | 72% | 49 | 70% |       |
|  | <i>No</i>                            | 49  | 28% | 21 | 30% |       |
|  | <b>Patient management</b>            |     |     |    |     |       |
|  | Modes of diagnosis                   |     |     |    |     | 0.45  |
|  | <i>Organized screening</i>           | 37  | 21% | 12 | 17% |       |
|  | <i>Individual screening</i>          | 74  | 42% | 26 | 37% |       |
|  | <i>Clinical signs</i>                | 67  | 38% | 32 | 46% |       |
|  | Type of hospitalization              |     |     |    |     | 0.78  |
|  | <i>Outpatient surgery</i>            | 108 | 61% | 43 | 61% |       |
|  | <i>Inpatient surgery</i>             | 70  | 39% | 27 | 39% |       |



**Figures:**

Figure 1: Percentage of patients on sick leave at 1-year follow-up depending on the presence or absence of chemotherapy

Figure 2: Percentage of patients on sick leave at 1-year follow-up depending on whether or not they had been given the work information booklet

Supplemental Figure 1: Flow Chart

**Competing Interests:** The authors declare that they have no competing interests.

**Funding:** This study was supported by a grant from the French National Cancer Institute dedicated to economic studies of innovative techniques. Delphine Héquet benefit from a grant of “Fondation pour la Recherche Médicale” to conduct this study.

**Reference**

1. Spelten ER, Sprangers MAG, Verbeek JHAM. Factors reported to influence the return to work of cancer survivors: a literature review. *Psychooncology* 2002;11(2):124-31.
2. Verdecchia A, Francisci S, Brenner H, et al. Recent cancer survival in Europe: a 2000-02 period analysis of EURO CARE-4 data. *Lancet Oncol* 2007;8(9):784-96.
3. Clark JC, Landis LL. Reintegration and maintenance of employees with breast cancer in the workplace. *AAOHN J Off J Am Assoc Occup Health Nurses* 1989;37(5):186-93.
4. Mellette SJ. The cancer patient at work. *CA Cancer J Clin* 1985;35(6):360-73.
5. Anderson NB, Armstead CA. Toward understanding the association of socioeconomic status and health: a new challenge for the biopsychosocial approach. *Psychosom Med* 1995;57(3):213-25.

- 1  
2  
3 6. Balak F, Roelen CAM, Koopmans PC, et al. Return to work after early-stage breast  
4 cancer: a cohort study into the effects of treatment and cancer-related symptoms. *J Occup*  
5 *Rehabil* 2008;18(3):267-72.  
6  
7
- 8  
9 7. Bouknight RR, Bradley CJ, Luo Z. Correlates of return to work for breast cancer  
10 survivors. *J Clin Oncol Off J Am Soc Clin Oncol* 2006;24(3):345-53.  
11  
12
- 13 8. de Boer AGEM, Taskila TK, Tamminga SJ, et al. Interventions to enhance return-to-  
14 work for cancer patients. *Cochrane Database Syst Rev* 2015;(9):CD007569.  
15  
16
- 17 9. Fantoni SQ, Peugniez C, Duhamel A, et al. Factors related to return to work by  
18 women with breast cancer in northern France. *J Occup Rehabil* 2010;20(1):49-58.  
19  
20
- 21 10. Hedayati E, Johnsson A, Alinaghizadeh H, et al. Cognitive, psychosocial, somatic and  
22 treatment factors predicting return to work after breast cancer treatment. *Scand J Caring Sci*  
23 2013;27(2):380-7.  
24  
25
- 26 11. Lavigne JE, Griggs JJ, Tu XM, et al. Hot flashes, fatigue, treatment exposures and work  
27 productivity in breast cancer survivors. *J Cancer Surviv Res Pract* 2008;2(4):296-302.  
28  
29
- 30 12. Baffert S, Hoang HL, Brédart A, et al. The patient-breast cancer care pathway: how  
31 could it be optimized? *BMC Cancer* 2015;15:394.  
32  
33
- 34 13. <https://www.fondation-arc.org/support-information/brochure-retour-au-travail->  
35 [apres-cancer.](https://www.fondation-arc.org/support-information/brochure-retour-au-travail-)  
36  
37
- 38 14. R Core Team (2012) R: a language and environment for statistical computing. R  
39 Foundation for Statistical Computing, Vienna, Austria; ISBN 3-900051-07-0. Available at:  
40 <http://www.R-project.org/> [<http://lib.stat.cmu.edu/r/CRAN>]. (last accessed 20 November  
41 2016).  
42  
43
- 44 15. Drolet M, Maunsell E, Mondor M, et al. Work absence after breast cancer diagnosis: a  
45 population-based study. *CMAJ Can Med Assoc J J Assoc Medicale Can* 2005;173(7):765-71.  
46  
47  
48  
49  
50  
51  
52  
53

16. Johnsson A, Fornander T, Rutqvist L-E, et al. Predictors of return to work ten months after primary breast cancer surgery. *Acta Oncol Stockh Swed* 2009;48(1):93-8.
17. Jagsi R, Hawley ST, Abrahamse P, et al. Impact of adjuvant chemotherapy on long-term employment of survivors of early-stage breast cancer. *Cancer* 2014;120(12):1854-62.
18. Eaker S, Wigertz A, Lambert PC, et al. Breast cancer, sickness absence, income and marital status. A study on life situation 1 year prior diagnosis compared to 3 and 5 years after diagnosis. *PloS One* 2011;6(3):e18040.
19. de Ruiter MB, Reneman L, Boogerd W, et al. Cerebral hyporesponsiveness and cognitive impairment 10 years after chemotherapy for breast cancer. *Hum Brain Mapp* 2011;32(8):1206-19.
20. Reinertsen KV, Cvancarova M, Loge JH, et al. Predictors and course of chronic fatigue in long-term breast cancer survivors. *J Cancer Surviv Res Pract* 2010;4(4):405-14.
21. Islam T, Dahlui M, Majid HA, et al. Factors associated with return to work of breast cancer survivors: a systematic review. *BMC Public Health* 2014;14 Suppl 3:S8.
22. Munir F, Burrows J, Yarker J, et al. Women's perceptions of chemotherapy-induced cognitive side effects on work ability: a focus group study. *J Clin Nurs* 2010;19(9-10):1362-70.
23. Nesvold I-L, Fosså SD, Holm I, et al. Arm/shoulder problems in breast cancer survivors are associated with reduced health and poorer physical quality of life. *Acta Oncol Stockh Swed* 2010;49(3):347-53.
24. Assis MR, Marx AG, Magna LA, et al. Late morbidity in upper limb function and quality of life in women after breast cancer surgery. *Braz J Phys Ther* 2013;17(3):236-43.

- 1  
2  
3 25. Devoogdt N, Van Kampen M, Christiaens et al. Short- and long-term recovery of  
4 upper limb function after axillary lymph node dissection. *Eur J Cancer Care*  
5 2011;20(1):77-86.  
6  
7  
8  
9  
10 26. Hayes SC, Rye S, Battistutta D, et al. Upper-body morbidity following breast cancer  
11 treatment is common, may persist longer-term and adversely influences quality of life.  
12 *Health Qual Life Outcomes* 2010;8:92.  
13  
14  
15  
16 27. Quinlan E, Thomas-MacLean R, Hack T, et al. The impact of breast cancer among  
17 Canadian women: disability and productivity. *Work Read Mass* 2009;34(3):285-96.  
18  
19  
20  
21 28. Stubblefield MD, Keole N. Upper body pain and functional disorders in patients with  
22 breast cancer. *PM R* 2014;6(2):170-83.  
23  
24  
25  
26 29. Boyages J, Kalfa S, Xu Y, et al. Worse and worse off: the impact of lymphedema on  
27 work and career after breast cancer. *SpringerPlus* 2016;5:657.  
28  
29  
30  
31 30. Hawkes AL, Gollschewski S, Lynch BM, et al. A telephone-delivered lifestyle  
32 intervention for colorectal cancer survivors « CanChange »: a pilot study. *Psychooncology*  
33 2009;18(4):449-55.  
34  
35  
36  
37  
38 31. Peugniez C, Fantoni S, Leroyer A, et al. Return to work after treatment for breast  
39 cancer: single-center experience in a cohort of 273 patients. *Ann Oncol Off J Eur Soc Med*  
40 *Oncol* 2010;21(10):2124-5.  
41  
42  
43  
44  
45 32. Sevellec M, Belin L, Bourrillon M-F, et al. Work ability in cancer patients: Six years  
46 assessment after diagnosis in a cohort of 153 workers. *Bull Cancer* 2015;102(6 Suppl 1):S5-  
47  
48  
49  
50 13.  
51  
52 33. VICAN2- [https://www.inserm.fr/.../rapport\\_complet\\_la-vie-2-ans-apres-un-](https://www.inserm.fr/.../rapport_complet_la-vie-2-ans-apres-un-diagnostic-de-cancer-2014)  
53  
54 diagnostic-de-cancer-2014.  
55  
56  
57  
58  
59  
60

1  
2  
3 34. Drolet M, Maunsell E, Brisson J, et al. Not working 3 years after breast cancer:  
4 predictors in a population-based study. *J Clin Oncol Off J Am Soc Clin Oncol*  
5 2005;23(33):8305-12.  
6  
7

8  
9  
10 35. Maunsell E, Drolet M, Brisson J, et al. Work situation after breast cancer: results from  
11 a population-based study. *J Natl Cancer Inst* 2004;96(24):1813-22.  
12  
13

14 36. Kennedy F, Haslam C, Munir F, et al. Returning to work following cancer: a qualitative  
15 exploratory study into the experience of returning to work following cancer. *Eur J Cancer*  
16 *Care* 2007;16(1):17-25.  
17  
18  
19  
20  
21  
22  
23  
24  
25  
26  
27  
28  
29  
30  
31  
32  
33  
34  
35  
36  
37  
38  
39  
40  
41  
42  
43  
44  
45  
46  
47  
48  
49  
50  
51  
52  
53  
54  
55  
56  
57  
58  
59  
60

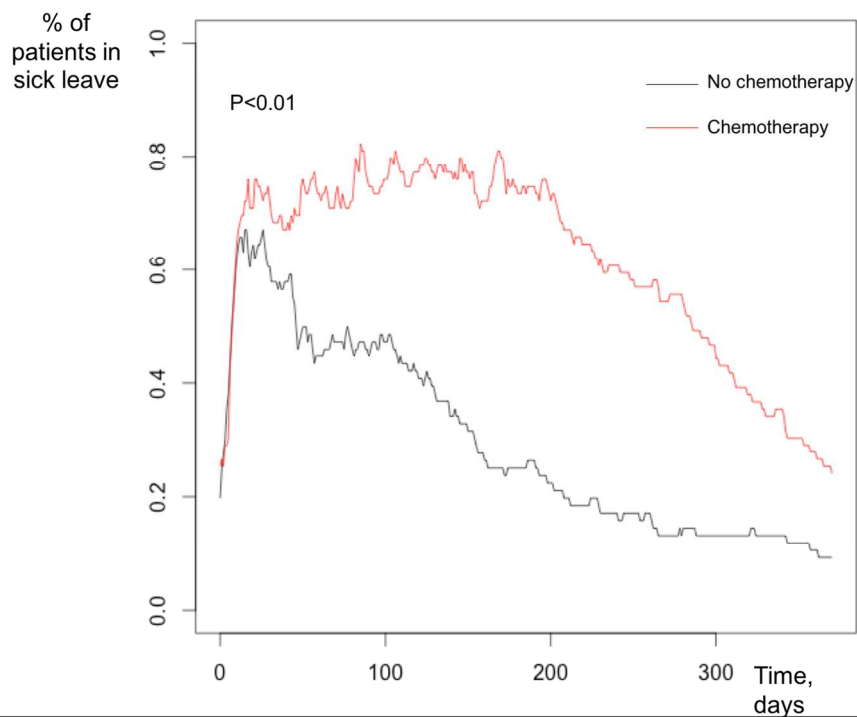

Figure 1: Percentage of patients on sick leave at 1-year follow-up depending on the presence or absence of chemotherapy

264x200mm (150 x 150 DPI)

Peer review only

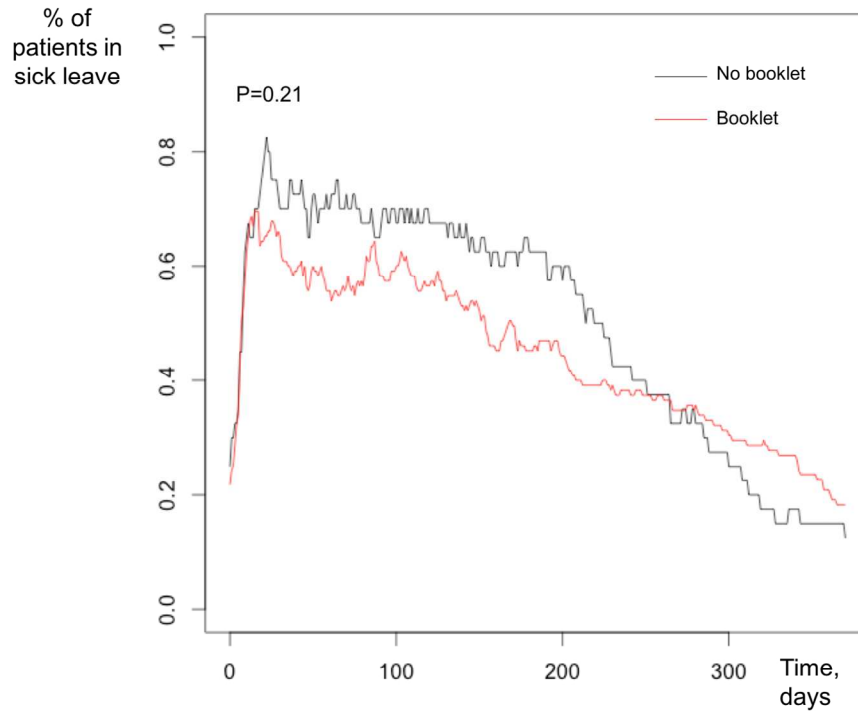

Figure 2: Percentage of patients on sick leave at 1-year follow-up depending on whether or not they had been given the work information booklet

262x205mm (150 x 150 DPI)

only

1  
2  
3  
4  
5  
6  
7  
8  
9  
10  
11  
12  
13  
14  
15  
16  
17  
18  
19  
20  
21  
22  
23  
24  
25  
26  
27  
28  
29  
30  
31  
32  
33  
34  
35  
36  
37  
38  
39  
40  
41  
42  
43  
44  
45  
46  
47  
48  
49  
50  
51  
52  
53  
54  
55  
56  
57  
58  
59  
60

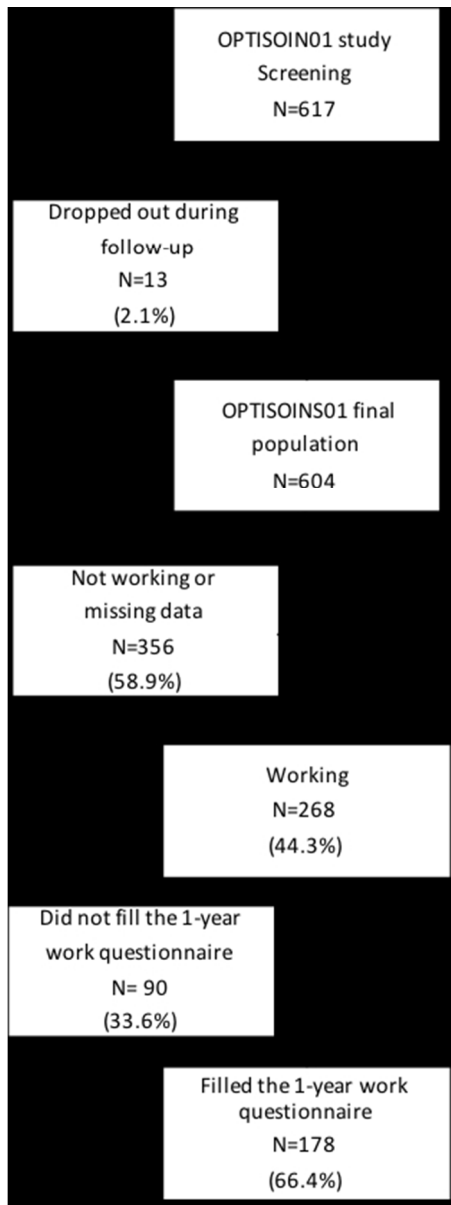

52x141mm (150 x 150 DPI)



**STROBE 2007 (v4) Statement—Checklist of items that should be included in reports of *cohort studies***

| Section/Topic             | Item # | Recommendation                                                                                                                                                                       | Reported on page # |
|---------------------------|--------|--------------------------------------------------------------------------------------------------------------------------------------------------------------------------------------|--------------------|
| Title and abstract        | 1      | (a) Indicate the study’s design with a commonly used term in the title or the abstract                                                                                               | 1                  |
|                           |        | (b) Provide in the abstract an informative and balanced summary of what was done and what was found                                                                                  | 4 and 5            |
| <b>Introduction</b>       |        |                                                                                                                                                                                      |                    |
| Background/rationale      | 2      | Explain the scientific background and rationale for the investigation being reported                                                                                                 | 7                  |
| Objectives                | 3      | State specific objectives, including any prespecified hypotheses                                                                                                                     | 7                  |
| <b>Methods</b>            |        |                                                                                                                                                                                      |                    |
| Study design              | 4      | Present key elements of study design early in the paper                                                                                                                              | 8                  |
| Setting                   | 5      | Describe the setting, locations, and relevant dates, including periods of recruitment, exposure, follow-up, and data collection                                                      | 8                  |
| Participants              | 6      | (a) Give the eligibility criteria, and the sources and methods of selection of participants. Describe methods of follow-up                                                           | 8                  |
|                           |        | (b) For matched studies, give matching criteria and number of exposed and unexposed                                                                                                  | 8                  |
| Variables                 | 7      | Clearly define all outcomes, exposures, predictors, potential confounders, and effect modifiers. Give diagnostic criteria, if applicable                                             | 9                  |
| Data sources/ measurement | 8*     | For each variable of interest, give sources of data and details of methods of assessment (measurement). Describe comparability of assessment methods if there is more than one group | 9                  |
| Bias                      | 9      | Describe any efforts to address potential sources of bias                                                                                                                            | 9                  |
| Study size                | 10     | Explain how the study size was arrived at                                                                                                                                            | 9                  |
| Quantitative variables    | 11     | Explain how quantitative variables were handled in the analyses. If applicable, describe which groupings were chosen and why                                                         | 9                  |
| Statistical methods       | 12     | (a) Describe all statistical methods, including those used to control for confounding                                                                                                | 9                  |
|                           |        | (b) Describe any methods used to examine subgroups and interactions                                                                                                                  | 9                  |
|                           |        | (c) Explain how missing data were addressed                                                                                                                                          | 9                  |
|                           |        | (d) If applicable, explain how loss to follow-up was addressed                                                                                                                       | 9                  |
|                           |        | (e) Describe any sensitivity analyses                                                                                                                                                | 9                  |
| <b>Results</b>            |        |                                                                                                                                                                                      | 9                  |

|                          |     |                                                                                                                                                                                                              |                       |
|--------------------------|-----|--------------------------------------------------------------------------------------------------------------------------------------------------------------------------------------------------------------|-----------------------|
| Participants             | 13* | (a) Report numbers of individuals at each stage of study—eg numbers potentially eligible, examined for eligibility, confirmed eligible, included in the study, completing follow-up, and analysed            | 9                     |
|                          |     | (b) Give reasons for non-participation at each stage                                                                                                                                                         | 10                    |
|                          |     | (c) Consider use of a flow diagram                                                                                                                                                                           | Supplemental figure 1 |
| Descriptive data         | 14* | (a) Give characteristics of study participants (eg demographic, clinical, social) and information on exposures and potential confounders                                                                     | 10 and 11             |
|                          |     | (b) Indicate number of participants with missing data for each variable of interest                                                                                                                          | 11                    |
|                          |     | (c) Summarise follow-up time (eg, average and total amount)                                                                                                                                                  | 11                    |
| Outcome data             | 15* | Report numbers of outcome events or summary measures over time                                                                                                                                               | 11                    |
| Main results             | 16  | (a) Give unadjusted estimates and, if applicable, confounder-adjusted estimates and their precision (eg, 95% confidence interval). Make clear which confounders were adjusted for and why they were included | 12-14                 |
|                          |     | (b) Report category boundaries when continuous variables were categorized                                                                                                                                    | 12-14                 |
|                          |     | (c) If relevant, consider translating estimates of relative risk into absolute risk for a meaningful time period                                                                                             | 12-14                 |
| Other analyses           | 17  | Report other analyses done—eg analyses of subgroups and interactions, and sensitivity analyses                                                                                                               | 13, 14                |
| <b>Discussion</b>        |     |                                                                                                                                                                                                              |                       |
| Key results              | 18  | Summarise key results with reference to study objectives                                                                                                                                                     | 16                    |
| <b>Limitations</b>       |     |                                                                                                                                                                                                              |                       |
| Interpretation           | 20  | Give a cautious overall interpretation of results considering objectives, limitations, multiplicity of analyses, results from similar studies, and other relevant evidence                                   | 16                    |
| Generalisability         | 21  | Discuss the generalisability (external validity) of the study results                                                                                                                                        | 17                    |
| <b>Other information</b> |     |                                                                                                                                                                                                              |                       |
| Funding                  | 22  | Give the source of funding and the role of the funders for the present study and, if applicable, for the original study on which the present article is based                                                | 23                    |

\*Give information separately for cases and controls in case-control studies and, if applicable, for exposed and unexposed groups in cohort and cross-sectional studies.

**Note:** An Explanation and Elaboration article discusses each checklist item and gives methodological background and published examples of transparent reporting. The STROBE checklist is best used in conjunction with this article (freely available on the Web sites of PLoS Medicine at <http://www.plosmedicine.org/>, Annals of Internal Medicine at <http://www.annals.org/>, and Epidemiology at <http://www.epidem.com/>). Information on the STROBE Initiative is available at [www.strobe-statement.org](http://www.strobe-statement.org).

# BMJ Open

## Determinants of maintenance at work of breast cancer patients: results from the OPTISOINS01 prospective study.

|                                 |                                                                                                                                                                                                                                                                                                                                                                                                                                                                                                                                |
|---------------------------------|--------------------------------------------------------------------------------------------------------------------------------------------------------------------------------------------------------------------------------------------------------------------------------------------------------------------------------------------------------------------------------------------------------------------------------------------------------------------------------------------------------------------------------|
| Journal:                        | <i>BMJ Open</i>                                                                                                                                                                                                                                                                                                                                                                                                                                                                                                                |
| Manuscript ID                   | bmjopen-2017-020276.R1                                                                                                                                                                                                                                                                                                                                                                                                                                                                                                         |
| Article Type:                   | Research                                                                                                                                                                                                                                                                                                                                                                                                                                                                                                                       |
| Date Submitted by the Author:   | 07-Feb-2018                                                                                                                                                                                                                                                                                                                                                                                                                                                                                                                    |
| Complete List of Authors:       | Arfi, Alexandra; Institut Curie, Surgery<br>Baffert, Sandrine; CEMKA-EVAL, Health Economist<br>Soilly, A-L; Universite de Bourgogne IUT Dijon-Auxerre, Health Economist<br>huchon, cyrille; Hôpital Poissy, Gynecology<br>Reyal, Fabien; Institut Curie, Surgery<br>Asselain, Bernard; Institut Curie, Biostatistics<br>Neffati, Souhir; Institut Curie, Clinical Research and Innovation<br>Department<br>Rouzier, Roman; Institut Curie, Surgery<br>Hequet, Delphine; Institut Curie-Centre René Huguenin, Surgical oncology |
| <b>Primary Subject Heading</b>: | Oncology                                                                                                                                                                                                                                                                                                                                                                                                                                                                                                                       |
| Secondary Subject Heading:      | Occupational and environmental medicine                                                                                                                                                                                                                                                                                                                                                                                                                                                                                        |
| Keywords:                       | Breast tumours < ONCOLOGY, OCCUPATIONAL & INDUSTRIAL MEDICINE, PUBLIC HEALTH                                                                                                                                                                                                                                                                                                                                                                                                                                                   |
|                                 |                                                                                                                                                                                                                                                                                                                                                                                                                                                                                                                                |

SCHOLARONE™  
Manuscripts

1  
2  
3 **Determinants of maintenance at work of breast cancer patients: results from the**  
4  
5 **OPTISOINS01 prospective study.**  
6  
7

8 Authors:

9  
10  
11 Alexandra Arfi<sup>1</sup>, Sandrine Baffert<sup>2</sup>, Anne-Laure Soilly<sup>3</sup>, Cyrille Huchon<sup>4,5</sup>, Fabien Reyal<sup>1,6</sup>,  
12  
13 Bernard Asselain<sup>7</sup>, Souhir Neffati<sup>8</sup>, Roman Rouzier<sup>1,9</sup>, Delphine Héquet<sup>1,9</sup>  
14  
15

16 Affiliations :

17  
18  
19 1: Department of Surgical Oncology, Institut Curie-Centre René Huguenin, 35 Rue Dailly,  
20  
21 92210 Saint-Cloud, France  
22

23  
24 2: Health Economics, CEMKA-EVAL, Bourg-la-Reine, 43 boulevard du Maréchal-Joffre, 92340  
25  
26 Bourg-la-Reine, France  
27

28  
29 3: Health Economics, Bourgogne Franche-Comté University, EA 7467, 2 boulevard Gabriel,  
30  
31 21000 Dijon, France  
32

33  
34 4: Department of Obstetrics and Gynecology, Hôpital de Poissy-St Germain, 10 Rue du  
35  
36 Champ Gaillard, 78300 Poissy, France  
37

38  
39 5: Equipe d'Accueil 7285, Risk and Safety in Clinical Medicine for Women and Perinatal  
40  
41 Health, University Versailles-Saint-Quentin, 2 av de la source de la Bièvre, 78180 Montigny-  
42  
43 le-Bretonneux, France  
44

45  
46 6: Residual Tumor and Response to Treatment Lab, Translational Research Department,  
47  
48 Institut Curie, 75005, Paris, France  
49

50  
51 7: Department of Biostatistics, Institut Curie-Centre René Huguenin, 35 Rue Dailly, 92210  
52  
53 Saint-Cloud, France  
54

55  
56 8: Clinical Research and Innovation Department, Sponsorship division, Institut Curie, 92210  
57  
58 Saint-Cloud, France  
59

1  
2  
3 9: René-Huguenin hospital, Institut Curie, Inserm U900 – Bioinformatics, biostatistics,  
4 epidemiology and computational systems. Cancer biology, 35, rue Dailly, 92210 Saint-Cloud,  
5  
6  
7 France

8  
9  
10  
11  
12 Corresponding author:

13  
14 Delphine HEQUET

15  
16 Postal address: 35 rue Dailly, 92210 St Cloud, France

17  
18 e-mail: [delphine.hequet@gmail.com](mailto:delphine.hequet@gmail.com)

19  
20 Phone number: 0033147111515

21  
22  
23  
24  
25 Word count: 2431

**Contributorship statement:**

Delphine Hequet, Roman Rouzier and Sandrine Baffert designed the study.

Bernard Asselain and Souhr Neffati contributed to the design and implementation of the research.

Sandrine Baffert and Anne-Laure Soilly performed the health economic analysis.

Alexandra Arfi and Delphine Hequet performed all the remaining statistical analysis and wrote the manuscript.

Cyrille Huchon and Fabien Reyal contributed to the clinical study, patients' inclusion and analysis of the results.

All the authors reviewed and approved the final version of the manuscript.

## ABSTRACT

**Introduction:** Return to work (RTW) after breast cancer (BC) is still a new field of research. The factors determining maintenance at work of BC patients have not been clearly identified. The aim of this study was to describe work during BC treatment and to identify factors associated with maintenance at work.

**Materials and methods:** An observational, prospective, multicenter study was conducted among women with operable BC. A logbook was given to all working patients to record sociodemographic and work-related data over a one-year period.

**Results:** Work-related data after BC were available for 178 patients (60%). Median age at diagnosis was 50 years (27-77), 87.9% of patients had an invasive form of BC and 25.3% a lymph node involvement. 25.9% had a radical surgery and 24.2% had an axillary dissection. Radiotherapy was performed in 90.9% of patients and chemotherapy in 48.1%. Sick leave was prescribed for 165 patients (92.7%) for a median of 155 days. On univariate analysis, invasive BC ( $p=0.025$ ), lymph node involvement ( $p=0.005$ ), radical surgery ( $p=0.025$ ), axillary dissection ( $p=0.004$ ), chemotherapy ( $p<0.001$ ), personal income  $< \text{€}1,900/\text{month}$  ( $p=0.03$ ) and not having received the patient information booklet on RTW ( $p=0.047$ ) were associated with a longer duration of sick leave. On multivariate analysis, chemotherapy was associated with longer sick leave (OR: 3.5; [95%CI: 1.6-7.9];  $p=0.002$ ). The cost of sick leave to French National Health Insurance was fourfold higher in the case of chemotherapy ( $p<0.001$ ).

**Conclusion:** Advanced disease and chemotherapy are major factors that influence maintenance at work during the management of BC. Systematic screening can help to diagnose earlier disease and reduce the need for aggressive therapy.

1  
2  
3 **Strengths and limitations of this study:**  
4

- 5  
6 - Prospective multicentric study  
7  
8 - Description of factors associated to long sick leave  
9  
10 - Multimodal analysis including evaluation of costs of sick leave  
11  
12 - Few qualitative information  
13  
14  
15  
16  
17

18 **Keywords:** breast cancer, return to work, maintenance at work, absence duration,  
19 chemotherapy.  
20  
21  
22  
23  
24  
25

26 **Data sharing statement:** No additional data available  
27

28 **Ethics:** This study was registered with ClinicalTrials.gov (Identifier: NCT02813317) and was  
29 approved by the French National ethics committee (CCTIRS Authorization No. 14.602 and  
30 CNIL DR-2014-167) covering research at all participating hospitals.  
31  
32

33 **Funding:** Delphine Hequet benefitted from a “Fondation pour la Recherche Medicale”  
34 (FDM20140630453) grant to conduct this study. This study was supported by a grant from  
35 the French National Cancer Institute (Institut National du Cancer, PRME-K2013), dedicated  
36 to economic studies of innovative techniques.  
37  
38  
39  
40  
41  
42  
43  
44  
45  
46  
47  
48  
49  
50  
51  
52  
53  
54  
55  
56  
57  
58  
59  
60



**What is already known on this subject?**

Return to work after breast cancer is a delicate step in the real-life reintegration. Breast cancer patients have difficulties at work even 5 years after the end of the treatments. The factors that maintain patients at work during breast cancer are rarely described.

**What this study adds?**

This prospective study describes work maintenance and sick leaves during the first year following the diagnosis of early breast cancer. After one year, 20% of the patients did not return to work. Chemotherapy dramatically increased the duration of sick leaves, whereas an early information on support can reduce sick leaves. Costs of sick leaves are major.

## INTRODUCTION

Improvements in early detection and treatment have resulted in an increasing number of breast cancer (BC) survivors [1]. Treatments mostly focus on curing the disease and preventing metastatic relapse. About one-third of women diagnosed with BC are under the age of 55 with a 10-year survival close to 80% [2]. Many patients therefore recover and resume their activities of daily living during or after treatment, including return to work (RTW). RTW after BC is still a new, but important aspect of survivorship research, not only from a societal point of view, as it provides financial resources for rehabilitation of cancer survivors and contributes to psychosocial well-being, including physical and mental health [3]. Some BC cancer survivors experience reduced work ability [4–8]. Difficulties at work or unemployment differ according to the type of BC treatment. Cancer treatment varies according to the stage of the disease and can include surgery, chemotherapy, radiotherapy and hormone therapy. For many cancer patients, return to work helps them to recover from treatment and also constitutes a positive step towards the future. The identification of factors that maintain patients at work during and after BC treatment could help healthcare professionals to more accurately identify patients at risk of RTW difficulties in order to provide them with adapted support during BC management. The aim of this prospective study was to describe work during and after BC management and identify factors associated with either cessation or maintenance at work.

## MATERIALS AND METHODS

OPTISOINS01 was an observational, prospective, multicenter study conducted from December 2014 to March 2016 among BC patients from a regional health territory. The

1  
2  
3 primary objective of the Optisoins01 study was to identify the main care pathway after 1  
4  
5 year of early BC and to evaluate costs from various perspectives. Maintenance and return to  
6  
7 work evaluation was one of the secondary objectives of the study. The Optisoins01 study  
8  
9 design has been previously described [9]. Eight non-profit hospitals participated in the study:  
10  
11 3 teaching hospitals, 4 general hospitals and 1 comprehensive cancer center. Inclusion  
12  
13 criteria were: women aged  $\geq 18$  years with previously untreated, first, histologically  
14  
15 confirmed, operable BC. Exclusion criteria were: metastatic, locally advanced, or  
16  
17 inflammatory BC, previous history of BC.  
18  
19

20  
21 After BC diagnosis, a work and cancer information booklet had to be given to all working  
22  
23 patients. Our Institute has designed an information booklet in collaboration with  
24  
25 occupational physicians and the Paris Regional Health Insurance (Caisse Régionale  
26  
27 d'Assurance Maladie d'Île-de-France). This document includes the testimonies from  
28  
29 employees, advice and practical information to help patients anticipate difficulties and find  
30  
31 support: possibility of part-time work, career development plan, roles of occupational  
32  
33 physicians and general practitioners. The booklet is freely available online with the support  
34  
35 of the "ARC" Foundation [10].  
36  
37  
38

39  
40 After inclusion, all patients were given a logbook in which to record, throughout the year,  
41  
42 sociodemographic data (age, marital status, type of occupation, personal income...), out-of-  
43  
44 pocket health expenses and an 1-year-occupational questionnaire for employed women  
45  
46 including dates of work and absence from work during treatments, job adjustments, on-shift  
47  
48 status and the perceived quality of reintegration with standardized self-questionnaire  
49  
50 (income change, difficulties at work with co-workers and/or with superiors...). Patients were  
51  
52 asked to fill the questionnaire prospectively during the all study period. During the second  
53  
54 half of the year, clinical research assistants made 2 phone calls to remind patients to fill in  
55  
56  
57  
58  
59  
60

1  
2  
3 the logbook. Questionnaires were collected at the end of the study. Types of occupations  
4  
5 were classified according to the French *Institut National de la Statistique et des Etudes*  
6  
7 *Economiques (INSEE)* classification.  
8

9  
10 Two groups of patients were compared in order to determine the factors associated with  
11  
12 maintenance at work: longer sick leave (longer or equal to the median duration) and shorter  
13  
14 sick leave (shorter than the median duration). Fisher's exact test or Student's t-test were  
15  
16 used to analyze these factors. These tests were two sided with a 0.05 level of significance.  
17  
18 Multivariate analysis was performed using a logistic regression model. We considered  
19  
20 adjusted p-value for multiple comparisons. Sick leave over a 1-year period was described  
21  
22 according to whether or not the patients were treated by chemotherapy. Differences in the  
23  
24 areas under the curves of the 2 populations were compared to 1,000 permutations of  
25  
26 random allocation of chemotherapy. The same analysis was performed according to whether  
27  
28 or not the patients had received the work information booklet. Differences were considered  
29  
30 significant for  $p < 0.05$ . All statistical analyses were performed with R software [11].  
31  
32  
33

34  
35 The cost of sick leave for National Health Insurance was calculated on the basis of the  
36  
37 monthly income declared by the patients, the duration of sick leave and the national sick  
38  
39 leave allowance scale.  
40

41  
42 This study was registered with ClinicalTrials.gov (Identifier: NCT02813317) and was approved  
43  
44 by the French National ethics committee (CCTIRS Authorization No. 14.602 and CNIL DR-  
45  
46 2014-167) covering research at all participating hospitals.  
47  
48  
49

## 50 51 **RESULTS**

52  
53  
54  
55  
56  
57  
58  
59  
60

Six hundred and four patients with a median age of 58 years (range: 24-98) were included in the Optisoins01 study, including 297 patients (48.2%) who were working at the time of BC diagnosis. The present study focused on these 297 patients.

Detailed patient characteristics and cancer characteristics are presented in Table 1. The median age of the women was 50 (range: 27-77) years, 54 women (18.2%) were single, 153 (51.5%) were married, 39 (13.1%) were divorced and 3 (1.0%) were widows. Two hundred and sixty-one patients (87.9%) had invasive BC and 35 (11.8%) had *in situ* BC. Seventy-five women (25.3%) presented axillary lymph node involvement.

Table 1: Patient and cancer characteristics and breast cancer treatments (n=297)

|                                      | n or median | % or range |
|--------------------------------------|-------------|------------|
| <b>Patient characteristics</b>       |             |            |
| Age (years)                          | 50          | (27-77)    |
| Marital status                       |             |            |
| <i>Single</i>                        | 54          | 18.2%      |
| <i>Married</i>                       | 153         | 51.5%      |
| <i>Divorced</i>                      | 39          | 13.1%      |
| <i>Widow</i>                         | 3           | 1%         |
| <i>NA</i>                            | 48          | 16.2%      |
| <b>Breast cancer characteristics</b> |             |            |
| Modes of diagnosis                   |             |            |
| <i>Organized screening</i>           | 60          | 20.2%      |
| <i>Individual screening</i>          | 114         | 38.4%      |
| <i>Clinical signs</i>                | 123         | 41.4%      |
| Type of cancer                       |             |            |
| <i>Invasive</i>                      | 261         | 87.9%      |
| <i>In situ</i>                       | 35          | 11.8%      |
| <i>NA</i>                            | 1           | 0.3%       |
| Lymph node involvement               |             |            |
| <i>Yes</i>                           | 75          | 25.3%      |
| <i>No</i>                            | 222         | 74.7%      |
| <b>Surgery</b>                       |             |            |
| Breast surgery                       |             |            |

|                           |                                      |     |       |
|---------------------------|--------------------------------------|-----|-------|
|                           | <i>Conservative</i>                  | 220 | 74.1% |
|                           | <i>Radical</i>                       | 77  | 25.9% |
| Lymph node surgery        |                                      |     |       |
|                           | <i>Sentinel lymph node procedure</i> | 203 | 68.4% |
|                           | <i>Axillary dissection</i>           | 72  | 24.2% |
|                           | <i>NA</i>                            | 22  | 7.4%  |
| Surgical revision         |                                      |     |       |
|                           | <i>no</i>                            | 227 | 76.4% |
|                           | <i>1</i>                             | 60  | 20.2% |
|                           | <i>&gt;1</i>                         | 10  | 3.4%  |
| Type of hospitalization   |                                      |     |       |
|                           | <i>Outpatient surgery</i>            | 107 | 36%   |
|                           | <i>Conventional surgery</i>          | 190 | 64%   |
| <b>Adjuvant therapies</b> |                                      |     |       |
| Radiotherapy              |                                      |     |       |
|                           | <i>No</i>                            | 27  | 9.1%  |
|                           | <i>Yes</i>                           | 270 | 90.9% |
| Chemotherapy              |                                      |     |       |
|                           | <i>Yes</i>                           | 143 | 48.1% |
|                           | <i>No</i>                            | 154 | 51.9% |
| Trastuzumab               |                                      |     |       |
|                           | <i>Yes</i>                           | 36  | 12.1% |
|                           | <i>No</i>                            | 100 | 33.7% |
|                           | <i>NA</i>                            | 161 | 54.2% |
| Hormone therapy           |                                      |     |       |
|                           | <i>Yes</i>                           | 220 | 74.1% |
|                           | <i>No</i>                            | 77  | 25.9% |

Two hundred and twenty women (74.1%) underwent breast-conserving surgery and 77 (25.9%) underwent radical mastectomy (Table 1). A sentinel lymph node procedure was performed for 203 patients (68.4%). Seventy patients required at least 1 reoperation for the following reasons: positive surgical margins and secondary mastectomy, sentinel lymph node procedure following discovery of an invasive tumor, axillary dissection following positive sentinel lymph node biopsy and surgical complications (abscess, hematoma, etc.).

After surgery, 90.9% of patients received radiotherapy 48.1% of patients received adjuvant chemotherapy and 74.1% of patients received hormone therapy.

Most patients were executives (31.4%) or employees (33.3%). Most patients (47.1%) had a monthly income > €1,900. Work data after BC were available for 178 patients (60%, supplemental Figure 1). Patients who did not complete the 1-year work questionnaire in the logbook during one year were globally less compliant with the study and less medicalized (supplemental table 1). Sick leave was prescribed for 165 patients (92.7%). Patients had only one sick leave in 52.2% of cases, 2 sick leaves in 21.9% of cases and 3 or more sick leaves in 18.5% of cases. Median duration of sick leave was 155 days (range: 5-365). After treatment, 7 patients (3.9%) lost their jobs and 46.1% had reduced income. Patients encountered difficulties with their co-workers in 3.4% of cases, with their superiors in 3.9% of cases and for undocumented reasons in 12.9% of cases. Work-related factors are summarized in Table 2.

Table 2: Work characteristics before and after BC

|                                                         | n or median | % or range |
|---------------------------------------------------------|-------------|------------|
| <b>Work characteristics before breast cancer, n=297</b> |             |            |
| Type of occupation                                      |             |            |
| <i>Farmer</i>                                           | 1           | 0.3%       |
| <i>Self-employed</i>                                    | 8           | 2.5%       |
| <i>Executive</i>                                        | 99          | 31.4%      |
| <i>Employee</i>                                         | 105         | 33.3%      |
| <i>Intermediate profession</i>                          | 29          | 9.2%       |
| <i>Blue-collar worker</i>                               | 2           | 0.6%       |
| <i>NA</i>                                               | 53          | 22.9%      |
| Personal income per month (€)                           |             |            |
| <i>no income</i>                                        | 6           | 2%         |
| <b>&lt; 1900</b>                                        | 104         | 35%        |
| <b>&gt;1900</b>                                         | 140         | 47.1%      |
| <i>NA</i>                                               | 47          | 15.8%      |
| <b>Work characteristics after breast cancer, n=178</b>  |             |            |

|                               |                       |     |         |
|-------------------------------|-----------------------|-----|---------|
| Dismissal                     |                       | 7   | 3.9%    |
| Income change                 |                       |     |         |
|                               | <i>decreased</i>      | 82  | 46.1%   |
|                               | <i>increased</i>      | 3   | 1.7%    |
|                               | <i>stable</i>         | 73  | 41%     |
|                               | <i>NA</i>             | 20  | 11.2%   |
| Decreased income (%), n=82    |                       |     |         |
|                               | <10%                  | 37  | 45.1%   |
|                               | 10-30%                | 13  | 15.8%   |
|                               | 30-60%                | 5   | 6.1%    |
|                               | >60%                  | 3   | 3.7%    |
|                               | <i>NA</i>             | 24  | 29.3%   |
| Sick leave                    |                       |     |         |
|                               | <i>Yes</i>            | 165 | 92.7%   |
|                               | <i>No</i>             | 13  | 7.3%    |
| Number of sick leaves         |                       |     |         |
|                               | <i>1</i>              | 93  | 52.2%   |
|                               | <i>2</i>              | 39  | 21.9%   |
|                               | <i>&gt;2</i>          | 33  | 18.5%   |
| Duration of sick leave (days) |                       | 155 | (5-365) |
| Difficulties at work          |                       |     |         |
|                               | <i>with coworkers</i> | 6   | 3.4%    |
|                               | <i>with superiors</i> | 7   | 3.9%    |
|                               | <i>other</i>          | 23  | 12.9%   |

On univariate analysis, the presence of clinical signs leading to a diagnosis of BC ( $p<0.001$ ), an invasive form of BC ( $p=0.02$ ), lymph node involvement ( $p=0.005$ ), radical surgery ( $p=0.02$ ), axillary dissection ( $p<0.001$ ), chemotherapy ( $p<0.001$ ), personal income < €1,900/month ( $p=0.03$ ) and not having received the work and cancer information booklet ( $p=0.047$ ) were associated with a longer total duration of sick leave (Table 3). Moreover, patients with longer sick leave were more likely to have reduced income after treatment of their disease ( $p=0.0012$ ).



Table 3: Determinants and consequences of long sick leave

|                                      | Sick leave <155 days, n=79 |            | Sick leave ≥155, days n=77 |              | p                |
|--------------------------------------|----------------------------|------------|----------------------------|--------------|------------------|
|                                      | n or median                | % or range | n or median                | % or range   |                  |
| <b>Patient characteristics</b>       |                            |            |                            |              |                  |
| Age (years)                          | 50.6                       | (27-59)    | 50                         | (29-77)      | 0.52             |
| Type of occupation                   |                            |            |                            |              | 0.09             |
| <i>Farmer</i>                        | 0                          | 0%         | 0                          | 0%           |                  |
| <i>Self-employed</i>                 | 3                          | 3.8%       | 1                          | 1.3%         |                  |
| <i>Executive</i>                     | 36                         | 45.6%      | 29                         | 37.7%        |                  |
| <i>Employee</i>                      | 25                         | 31.6%      | 38                         | 49.4%        |                  |
| <i>Intermediate profession</i>       | 13                         | 16.5%      | 7                          | 9.1%         |                  |
| <i>Blue-collar worker</i>            | 1                          | 1.3%       | 0                          | 0%           |                  |
| NA                                   | 1                          | 1.3%       | 2                          |              |                  |
| Personal income per month (€)        |                            |            |                            |              | <b>0.03</b>      |
| < 1900                               | 25                         | 31.6%      | 37                         | 48.1%        |                  |
| > 1900                               | 54                         | 68.4%      | 38                         | 49.4%        |                  |
| NA                                   | 0                          | 0%         | 2                          | 2.6%         |                  |
| Marital status                       |                            |            |                            |              | 0.76             |
| <i>Single</i>                        | 18                         | 22.8%      | 12                         | 15.6%        |                  |
| <i>Married</i>                       | 47                         | 59.5%      | 49                         | 63.6%        |                  |
| <i>Divorced</i>                      | 12                         | 15.2%      | 14                         | 18.2%        |                  |
| <i>Widow</i>                         | 1                          | 1.3%       | 1                          | 1.3%         |                  |
| NA                                   | 1                          | 1.3%       | 1                          | 1.3%         |                  |
| <b>Breast cancer characteristics</b> |                            |            |                            |              |                  |
| Type of cancer                       |                            |            |                            |              | <b>&lt;0.001</b> |
| <i>Invasive</i>                      | 63                         | 79.7%      | 74                         | 96.1%        |                  |
| <i>In situ</i>                       | 16                         | 20.3%      | 3                          | 3.9%         |                  |
| Lymph node involvement               |                            |            |                            |              | <b>0.005</b>     |
| Yes                                  | 11                         | 13.9%      | <b>26</b>                  | <b>33.8%</b> |                  |
| No                                   | 68                         | 86.1%      | <b>52</b>                  | <b>67.5%</b> |                  |
| <b>Surgery</b>                       |                            |            |                            |              |                  |
| Breast surgery                       |                            |            |                            |              | <b>0.02</b>      |
| <i>Conservative</i>                  | 66                         | 83.5%      | 50                         | 64.9%        |                  |
| <i>Radical</i>                       | 13                         | 16.5%      | 27                         | 35.1%        |                  |
| Lymph node surgery                   |                            |            |                            |              | <b>&lt;0.001</b> |
| <i>Sentinel lymph node procedure</i> | 62                         | 78.5%      | 48                         | 62.3%        |                  |
| <i>Axillary dissection</i>           | 9                          | 11.4%      | 26                         | 33.8%        |                  |
| NA                                   | 8                          | 10.1%      | 3                          | 3.9%         |                  |
| Surgical revision                    |                            |            |                            |              | 0.06             |

|    |                                     |                             |    |       |    |        |
|----|-------------------------------------|-----------------------------|----|-------|----|--------|
| 1  |                                     |                             |    |       |    |        |
| 2  |                                     |                             |    |       |    |        |
| 3  |                                     | Yes                         | 13 | 16.5% | 23 | 29.9%  |
| 4  |                                     | No                          | 66 | 83.5% | 54 | 70.1%  |
| 5  | Radiotherapy                        |                             |    |       |    | 0.53   |
| 6  |                                     | Yes                         | 72 | 91.1% | 74 | 96.1%  |
| 7  |                                     | No                          | 7  | 8.9%  | 3  | 3.9%   |
| 8  | Chemotherapy                        |                             |    |       |    | <0.001 |
| 9  |                                     | Yes                         | 25 | 31.6% | 56 | 72.7%  |
| 10 |                                     | No                          | 54 | 68.4% | 21 | 27.3%  |
| 11 | Trastuzumab                         |                             |    |       |    | 0.54   |
| 12 |                                     | Yes                         | 9  | 11.4% | 12 | 15.6%  |
| 13 |                                     | No                          | 16 | 20.3% | 40 | 51.9%  |
| 14 |                                     | NA                          | 54 | 68.4% | 25 | 32.5%  |
| 15 | Hormone therapy                     |                             |    |       |    | 0.05   |
| 16 |                                     | Yes                         | 50 | 63.3% | 61 | 79.2%  |
| 17 |                                     | No                          | 29 | 36.7% | 16 | 20.8%  |
| 18 | <b>Patient management</b>           |                             |    |       |    |        |
| 19 | Modes of diagnosis                  |                             |    |       |    | <0.001 |
| 20 |                                     | <i>Organized screening</i>  | 15 | 19%   | 21 | 27.3%  |
| 21 |                                     | <i>Individual screening</i> | 43 | 54.4% | 20 | 26%    |
| 22 |                                     | <i>Clinical signs</i>       | 21 | 26.6% | 36 | 46.8%  |
| 23 | Type of hospitalization             |                             |    |       |    | <0.001 |
| 24 |                                     | <i>Outpatient surgery</i>   | 58 | 73.4% | 34 | 44.2%  |
| 25 |                                     | <i>Inpatient surgery</i>    | 21 | 26.6% | 43 | 55.8%  |
| 26 | Work and cancer information booklet |                             |    |       |    |        |
| 27 |                                     | Yes                         | 64 | 81%   | 52 | 67.5%  |
| 28 |                                     | No                          | 15 | 19%   | 25 | 32.5%  |
| 29 | <b>Return to work</b>               |                             |    |       |    |        |
| 30 | Dismissal                           |                             | 1  | 1.3%  | 3  | 3.9%   |
| 31 | Income change                       |                             |    |       |    | 0.62   |
| 32 |                                     | <i>decreased</i>            | 23 | 29.1% | 48 | 62.3%  |
| 33 |                                     | <i>increased</i>            | 0  | 0%    | 2  | 2.6%   |
| 34 |                                     | <i>stable</i>               | 37 | 46.8% | 24 | 31.2%  |
| 35 |                                     | NA                          | 19 | 24.1% | 3  | 3.9%   |
| 36 | Decreased income (%)                |                             |    |       |    | 0.61   |
| 37 |                                     | <10%                        | 11 | 13.9% | 21 | 27.3%  |
| 38 |                                     | 10-30%                      | 4  | 5.1%  | 7  | 9.1%   |
| 39 |                                     | 30-60%                      | 0  | 0%    | 4  | 5.2%   |
| 40 |                                     | >60%                        | 0  | 0%    | 3  | 3.9%   |
| 41 |                                     | NA                          | 64 | 81%   | 42 | 54.5%  |
| 42 | Difficulties at work                |                             |    |       |    |        |
| 43 |                                     | <i>with coworkers</i>       | 2  | 2.5%  | 3  | 3.9%   |
| 44 |                                     | <i>with superiors</i>       | 0  | 0%    | 6  | 7.8%   |
| 45 |                                     |                             |    |       |    | 0.17   |
| 46 |                                     |                             |    |       |    |        |
| 47 |                                     |                             |    |       |    |        |
| 48 |                                     |                             |    |       |    |        |
| 49 |                                     |                             |    |       |    |        |
| 50 |                                     |                             |    |       |    |        |
| 51 |                                     |                             |    |       |    |        |
| 52 |                                     |                             |    |       |    |        |
| 53 |                                     |                             |    |       |    |        |
| 54 |                                     |                             |    |       |    |        |
| 55 |                                     |                             |    |       |    |        |
| 56 |                                     |                             |    |       |    |        |
| 57 |                                     |                             |    |       |    |        |
| 58 |                                     |                             |    |       |    |        |
| 59 |                                     |                             |    |       |    |        |
| 60 |                                     |                             |    |       |    |        |

---

|              |   |      |    |       |      |
|--------------|---|------|----|-------|------|
| <i>other</i> | 7 | 8.9% | 14 | 18.2% | 0.93 |
|--------------|---|------|----|-------|------|

---

On multivariate analysis, chemotherapy was the only independent factor associated with longer sick leave (OR: 3.5, [95%CI: 1.6-7.9],  $p=0.002$ ). Patients treated by chemotherapy had longer sick leave than those not treated by chemotherapy (Figure 1). The difference in terms of the 1-year distribution of sick leave was not statistically significant between patients according to whether or not they had received the work information booklet (Figure 2).

Considering the working population of OPTISOINS01 study with complete data on sick leave and salary, the median cost of sick leave for National Health Insurance was €8,841 per patient per year from diagnosis. In univariate and multivariate analysis, the only determinant of sick leave costs found in this study was the administration of chemotherapy, with a fourfold higher median allowance for patients treated with adjuvant chemotherapy.

## DISCUSSION

Although many BC cancer survivors are able to return to a normal work life after treatment, our study confirms that many women of working ages do not. Sick leave is frequently prescribed and is often long, with a median sick leave of 155 days in this study.

Factors associated with long sick leave (>155 days) were severe or advanced forms of BC. The duration of sick leave was also associated with the mode of diagnosis, as patients diagnosed by breast screening presented shorter sick leaves. Public health authorities should therefore promote breast screening in order to decrease the proportion of advanced forms of BC and aggressive therapies with severe consequences on work and personal activities.

1  
2  
3 Consequently, longer sick leave was also associated with more aggressive therapy, such as  
4  
5 radical surgery, axillary dissection, and chemotherapy. These results are similar to those  
6  
7 published in the literature [4,7,8,12,13]. Chemotherapy is an aggressive treatment that is  
8  
9 necessary in order to ensure survival, but which has long-lasting consequences in terms of  
10  
11 self-esteem (alopecia...), chronic pain (neuropathy...), and chronic fatigue, that play an  
12  
13 important role in return to work and maintenance at work [6]. BC survivors may have to deal  
14  
15 with the side effects specific to this type of treatment. Although many side effects of  
16  
17 chemotherapy are only temporary [14], some studies have shown that chemotherapy may  
18  
19 impact on cognitive functioning [15] and fatigue [16] up to 10 years after diagnosis.  
20  
21 Cognitive functioning and fatigue have both been associated with impaired work functioning  
22  
23 [17]. Munir et al [18] reported that up to 62–84% of women resumed work either during  
24  
25 treatment with chemotherapy or following completion of treatment. As a result of their  
26  
27 cognitive limitations, women reported that they experienced difficulties with their work  
28  
29 ability, particularly difficulties doing multiple tasks, reduced clarity of decisions, deficits in  
30  
31 clear thinking and feelings of being inept due to short-term memory [19]. Rapid progress is  
32  
33 being made in the field of chemotherapy with the routine use of new genomic signature  
34  
35 tests that allow more accurate targeting of patient likely to benefit from chemotherapy.  
36  
37 According to Nesvold et al [20] and Eaker et al [14] mastectomy and axillary lymph node  
38  
39 dissection may influence working life long after treatment due to an increased risk of chronic  
40  
41 pain. BC survivors are more likely to suffer from upper extremity impairments or  
42  
43 lymphedema than are other cancer survivors [21–24], which are responsible for difficulties  
44  
45 returning to work or maintenance at work [25,26].  
46  
47  
48  
49  
50  
51  
52  
53  
54  
55  
56  
57  
58  
59  
60

1  
2  
3 The work and cancer information booklet appeared to help patients return to work with  
4 significantly shorter sick leave in univariate analysis. The strong impact of chemotherapy on  
5 sick leave duration eliminated the influence of booklet in the multivariate analysis. However,  
6 this suggests that an action, such as an active support, could help to reduce sick leave  
7 duration. The information booklet advises women to attend the occupational medicine  
8 service. In France, occupational medicine plays an essential role, but the patient is not  
9 obliged to consult the occupational physician when sick leave is < 3 months. However, at 3  
10 months, the occupational physician and the employee must determine the modalities of  
11 return to work, based on the employee's state of health and the characteristics of the  
12 workplace. These arrangements concern the employee himself and the work collective with,  
13 if necessary, actions so that the reception is assured to the return. Setting up of a schedule,  
14 reduction of working hours, modification of physical, mental or workplace loads can also be  
15 instituted at the time of return to work. The occupational physician can provide  
16 recommendations to the employer, unless the employer refuses. The results obtained with  
17 this handbook are particularly encouraging and suggest that more individual supports should  
18 be developed. Health coaching by telephone and/or face-to-face interview have already  
19 been tested [27–29], showing positive significant outcomes on physical activity, body mass  
20 index, pain management, acceptance of disease and self-confidence among cancer survivors.  
21 Coaching methods have never been tested in the management of work maintenance. Our  
22 Institute is therefore setting up a prospective randomized study (OPTICOACH) with tailored  
23 support intervention to enhance RTW after BC in collaboration with a professional coach,  
24 consisting of individual interviews or small group workshops over a period of 3 years.

25  
26  
27  
28  
29  
30  
31  
32  
33  
34  
35  
36  
37  
38  
39  
40  
41  
42  
43  
44  
45  
46  
47  
48  
49  
50  
51  
52  
53 Difficulties returning to work appear to extend over a period of many years. Sevellec et al  
54 [28] showed that, six years after returning to work, one employee out of two was still  
55  
56  
57  
58  
59  
60

1  
2  
3 working in the same company. Rather than disappearing, the difficulties identified many  
4  
5 years after BC persist for a long time after stopping treatment. It is therefore essential to  
6  
7 identify the factors associated with longer sick leave and RTW difficulties in order to help  
8  
9 working patients and prevent these long-term problems. The VICAN 2 study [29] focused  
10  
11 on the factors associated to difficulties at RTW. This large study was carried out in 2014 by  
12  
13 the French National Cancer Institute, on the living conditions of people with cancer (not  
14  
15 only BC), two years after the diagnosis. The people most vulnerable to job loss two years  
16  
17 after the cancer diagnosis are mainly those working in the so-called socio-professional  
18  
19 execution categories, the youngest and oldest, married people with a level of education  
20  
21 below the baccalaureate level, and those with precarious contracts.  
22  
23

24  
25 One of the potential biases of this study concerns the characteristics of the study  
26  
27 population, as almost the majority of women belonged to the wealthiest social classes, as  
28  
29 45.6% of patients were executives and only 1.3% were blue collar workers. More than  
30  
31 sixty-eight percent of patients had a personal monthly income > €1,900 and 36.7% had a  
32  
33 personal monthly income > €2,600. This distribution does not exactly reflect French  
34  
35 society; in France, according to the INSEE statistics of 2014, the median monthly income  
36  
37 was €1,772. Similarly to our results, a Canadian team [30] has shown that women with an  
38  
39 annual income less than C\$20,000 were less likely to return to work than those whose  
40  
41 income exceeded C\$50,000. The French social protection system also plays a role, as it  
42  
43 provides cancer survivors with the possibility of replacement income, allowing women to  
44  
45 decide whether or not they wish to return to work immediately. Providing assistance and  
46  
47 support to all working patients should therefore be a priority.  
48  
49  
50  
51  
52  
53  
54

## 55 **CONCLUSION**

56  
57  
58  
59  
60

1  
2  
3 Advanced disease and chemotherapy are major factors that influence return to work with  
4  
5 longer sick-leave. Systematic screening or use of innovative tools, such as genomic  
6  
7 signatures, can facilitate earlier diagnosis and reduce aggressive therapies.  
8

9  
10 Depending on the type of treatment, on the stage of the disease and on the type of  
11  
12 occupation, information and coaching methods with the occupational medicine service  
13  
14 should systematically be given to working women, helping them to anticipate job  
15  
16 adjustments with flexibility of work schedule for example.  
17

18  
19 Personalized coaching methods have been successfully used to promote acceptance of  
20  
21 disease and self-confidence and should be tested in the management of return to work and  
22  
23 maintenance at work.  
24  
25  
26  
27  
28  
29  
30  
31  
32  
33  
34  
35  
36  
37  
38  
39  
40  
41  
42  
43  
44  
45  
46  
47  
48  
49  
50  
51  
52  
53  
54  
55  
56  
57  
58  
59  
60

**Figures:**

Figure 1: Percentage of patients on sick leave at 1-year follow-up depending on the presence or absence of chemotherapy

Figure 2: Percentage of patients on sick leave at 1-year follow-up depending on whether or not they had been given the work information booklet

Supplemental Figure 1: Flow Chart

**Competing Interests:** The authors declare that they have no competing interests.

**Funding:** This study was supported by a grant from the French National Cancer Institute dedicated to economic studies of innovative techniques. Delphine Héquet benefit from a grant of “Fondation pour la Recherche Médicale” to conduct this study.

**REFERENCES**

- 1 Breast Cancer Facts & figures 2013-2014 (2013) Atlanta: American Cancer Society, Inc. <http://cancer.org/acs/groups/content/@research/documents/document/acspc-042725.pdf>. Accessed 9/20/2014.
- 2 Verdecchia A, Francisci S, Brenner H, *et al.* Recent cancer survival in Europe: a 2000-02 period analysis of EURO CARE-4 data. *Lancet Oncol* 2007;**8**:784–96. doi:10.1016/S1470-2045(07)70246-2
- 3 Mehnert A, de Boer A, Feuerstein M. Employment challenges for cancer survivors: Employment Challenges. *Cancer* 2013;**119**:2151–9. doi:10.1002/cncr.28067
- 4 Balak F, Roelen CAM, Koopmans PC, *et al.* Return to work after early-stage breast cancer: a cohort study into the effects of treatment and cancer-related symptoms. *J Occup Rehabil* 2008;**18**:267–72. doi:10.1007/s10926-008-9146-z
- 5 de Boer AGEM, Taskila TK, Tamminga SJ, *et al.* Interventions to enhance return-to-work for cancer patients. *Cochrane Database Syst Rev* 2015;:CD007569. doi:10.1002/14651858.CD007569.pub3



- 6 Fantoni SQ, Peugniez C, Duhamel A, *et al.* Factors related to return to work by women with breast cancer in northern France. *J Occup Rehabil* 2010;**20**:49–58. doi:10.1007/s10926-009-9215-y
- 7 Hedayati E, Johnsson A, Alinaghizadeh H, *et al.* Cognitive, psychosocial, somatic and treatment factors predicting return to work after breast cancer treatment. *Scand J Caring Sci* 2013;**27**:380–7. doi:10.1111/j.1471-6712.2012.01046.x
- 8 Lavigne JE, Griggs JJ, Tu XM, *et al.* Hot flashes, fatigue, treatment exposures and work productivity in breast cancer survivors. *J Cancer Surviv Res Pract* 2008;**2**:296–302. doi:10.1007/s11764-008-0072-z
- 9 Baffert S, Hoang HL, Brédart A, *et al.* The patient-breast cancer care pathway: how could it be optimized? *BMC Cancer* 2015;**15**:394. doi:10.1186/s12885-015-1417-4
- 10 <https://www.fondation-arc.org/support-information/brochure-retour-au-travail-apres-cancer>.
- 11 R Core Team (2012) R: a language and environment for statistical computing. R Foundation for Statistical Computing, Vienna, Austria; ISBN 3-900051-07-0. Available at: <http://www.R-project.org/> [<http://lib.stat.cmu.edu/r/CRAN>]. (last accessed 20 November 2016).
- 12 Jaggi R, Hawley ST, Abrahamse P, *et al.* Impact of adjuvant chemotherapy on long-term employment of survivors of early-stage breast cancer. *Cancer* 2014;**120**:1854–62. doi:10.1002/cncr.28607
- 13 Johnsson A, Fornander T, Rutqvist L-E, *et al.* Predictors of return to work ten months after primary breast cancer surgery. *Acta Oncol Stockh Swed* 2009;**48**:93–8. doi:10.1080/02841860802477899
- 14 Eaker S, Wigertz A, Lambert PC, *et al.* Breast cancer, sickness absence, income and marital status. A study on life situation 1 year prior diagnosis compared to 3 and 5 years after diagnosis. *PLoS One* 2011;**6**:e18040. doi:10.1371/journal.pone.0018040
- 15 de Ruiter MB, Reneman L, Boogerd W, *et al.* Cerebral hyporesponsiveness and cognitive impairment 10 years after chemotherapy for breast cancer. *Hum Brain Mapp* 2011;**32**:1206–19. doi:10.1002/hbm.21102
- 16 Reinertsen KV, Cvancarova M, Loge JH, *et al.* Predictors and course of chronic fatigue in long-term breast cancer survivors. *J Cancer Surviv Res Pract* 2010;**4**:405–14. doi:10.1007/s11764-010-0145-7
- 17 Islam T, Dahlui M, Majid HA, *et al.* Factors associated with return to work of breast cancer survivors: a systematic review. *BMC Public Health* 2014;**14 Suppl 3**:S8. doi:10.1186/1471-2458-14-S3-S8

- 1  
2  
3 18 Munir F, Burrows J, Yarker J, *et al.* Women's perceptions of chemotherapy-induced  
4 cognitive side effects on work ability: a focus group study. *J Clin Nurs* 2010;**19**:1362–70.  
5 doi:10.1111/j.1365-2702.2009.03006.x  
6  
7 19 Hoving J, Broekhuizen M, Frings-Dresen M. Return to work of breast cancer survivors: a  
8 systematic review of intervention studies. *BMC Cancer* 2009;**9**. doi:10.1186/1471-2407-  
9 9-117  
10  
11 20 Nesvold I-L, Fosså SD, Holm I, *et al.* Arm/shoulder problems in breast cancer survivors  
12 are associated with reduced health and poorer physical quality of life. *Acta Oncol Stockh*  
13 *Swed* 2010;**49**:347–53. doi:10.3109/02841860903302905  
14  
15 21 Assis MR, Marx AG, Magna LA, *et al.* Late morbidity in upper limb function and quality of  
16 life in women after breast cancer surgery. *Braz J Phys Ther* 2013;**17**:236–43.  
17  
18 22 Devoogdt N, Van Kampen M, Christiaens MR, *et al.* Short- and long-term recovery of  
19 upper limb function after axillary lymph node dissection. *Eur J Cancer Care (Engl)*  
20 2011;**20**:77–86. doi:10.1111/j.1365-2354.2009.01141.x  
21  
22 23 Hayes SC, Rye S, Battistutta D, *et al.* Upper-body morbidity following breast cancer  
23 treatment is common, may persist longer-term and adversely influences quality of life.  
24 *Health Qual Life Outcomes* 2010;**8**:92. doi:10.1186/1477-7525-8-92  
25  
26 24 Stubblefield MD, Keole N. Upper body pain and functional disorders in patients with  
27 breast cancer. *PM R* 2014;**6**:170–83. doi:10.1016/j.pmrj.2013.08.605  
28  
29 25 Boyages J, Kalfa S, Xu Y, *et al.* Worse and worse off: the impact of lymphedema on work  
30 and career after breast cancer. *SpringerPlus* 2016;**5**:657. doi:10.1186/s40064-016-2300-  
31 8  
32  
33 26 Peugniez C, Fantoni S, Leroyer A, *et al.* Return to work after treatment for breast cancer:  
34 single-center experience in a cohort of 273 patients. *Ann Oncol Off J Eur Soc Med Oncol*  
35 2010;**21**:2124–5. doi:10.1093/annonc/mdq556  
36  
37 27 Hawkes AL, Gollschewski S, Lynch BM, *et al.* A telephone-delivered lifestyle intervention  
38 for colorectal cancer survivors “CanChange”: a pilot study. *Psychooncology* 2009;**18**:449–  
39 55. doi:10.1002/pon.1527  
40  
41 28 Sevellec M, Belin L, Bourrillon M-F, *et al.* [Work ability in cancer patients: Six years  
42 assessment after diagnosis in a cohort of 153 workers]. *Bull Cancer (Paris)* 2015;**102**:S5-  
43 13. doi:10.1016/S0007-4551(15)31212-1  
44  
45 29 VICAN2- [https://www.inserm.fr/.../rapport\\_complet\\_la-vie-2-ans-apres-un-diagnostic-](https://www.inserm.fr/.../rapport_complet_la-vie-2-ans-apres-un-diagnostic-de-cancer-2014)  
46 [de-cancer-2014](https://www.inserm.fr/.../rapport_complet_la-vie-2-ans-apres-un-diagnostic-de-cancer-2014).  
47  
48 30 Drolet M, Maunsell E, Brisson J, *et al.* Not working 3 years after breast cancer: predictors  
49 in a population-based study. *J Clin Oncol Off J Am Soc Clin Oncol* 2005;**23**:8305–12.  
50 doi:10.1200/JCO.2005.09.500  
51  
52  
53  
54  
55  
56  
57  
58  
59

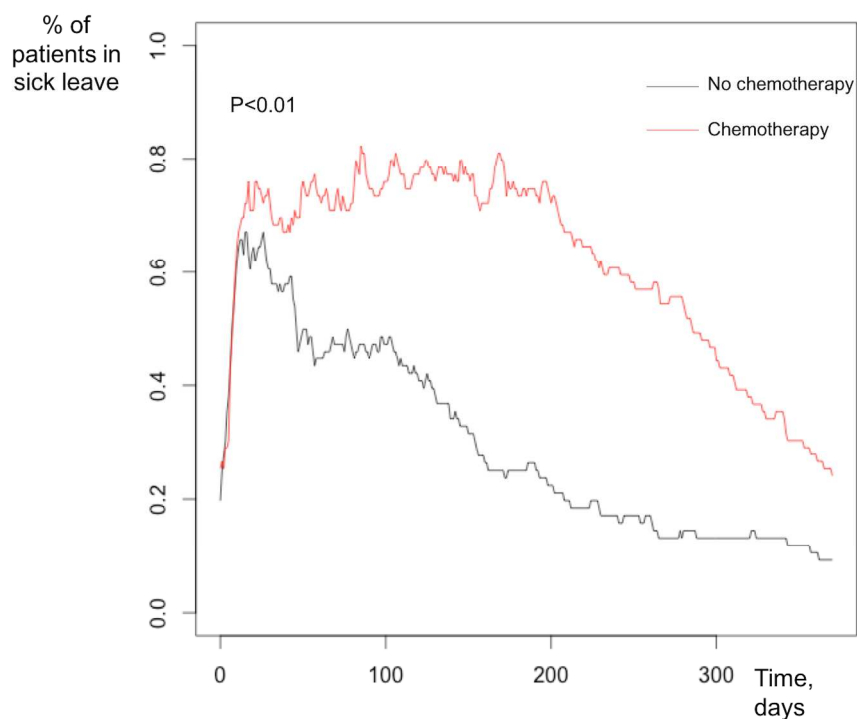

Figure 1: Percentage of patients on sick leave at 1-year follow-up depending on the presence or absence of chemotherapy

264x200mm (300 x 300 DPI)

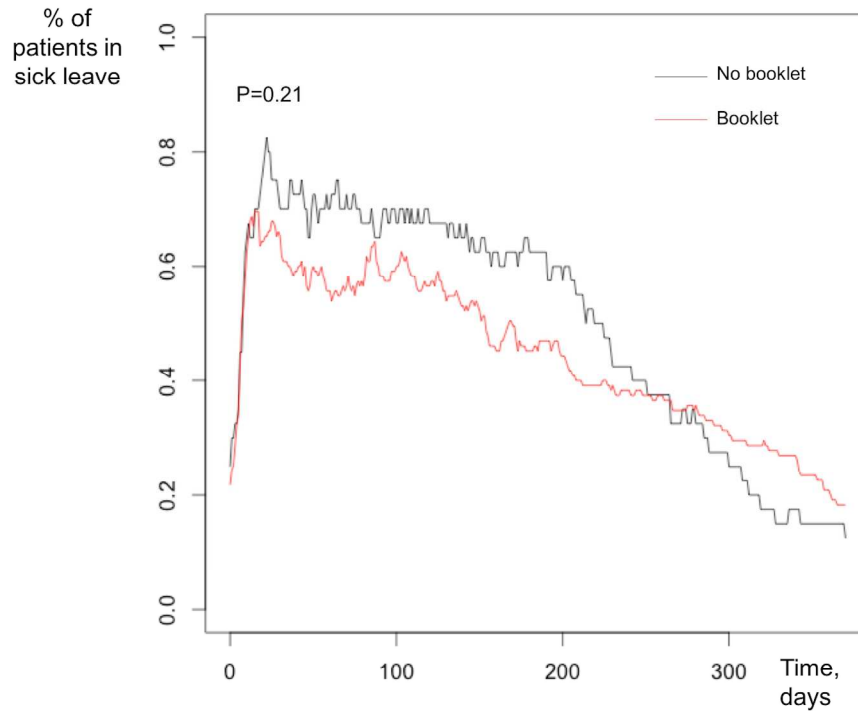

Figure 2: Percentage of patients on sick leave at 1-year follow-up depending on whether or not they had been given the work information booklet

262x205mm (300 x 300 DPI)

only

1  
2  
3  
4  
5  
6  
7  
8  
9  
10  
11  
12  
13  
14  
15  
16  
17  
18  
19  
20  
21  
22  
23  
24  
25  
26  
27  
28  
29  
30  
31  
32  
33  
34  
35  
36  
37  
38  
39  
40  
41  
42  
43  
44  
45  
46  
47  
48  
49  
50  
51  
52  
53  
54  
55  
56  
57  
58  
59  
60

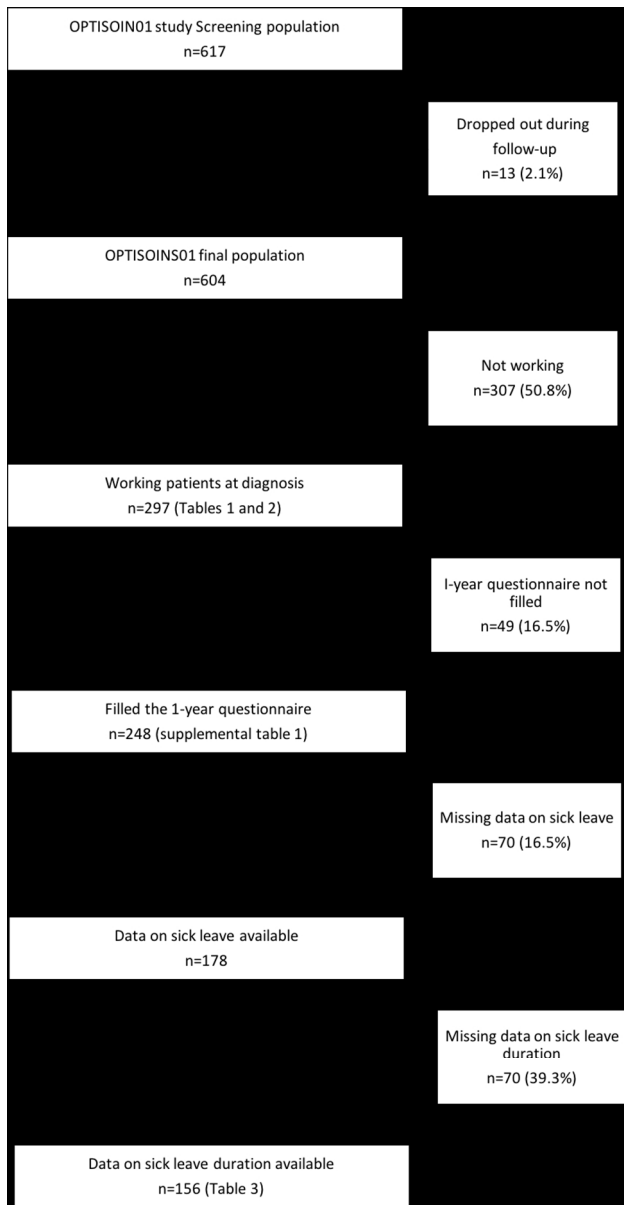

146x279mm (150 x 150 DPI)

Supplemental Table 1: Differences between patients who returned the 1-year questionnaire with data on sick leave (n=178) and no data on sick leave (n=70)

|                                      | Data on sick leave, n=178            |            | No data on sick leave, n=70 |            | p               |
|--------------------------------------|--------------------------------------|------------|-----------------------------|------------|-----------------|
|                                      | n or median                          | % or range | n or median                 | % or range |                 |
| <b>Patient characteristics</b>       |                                      |            |                             |            |                 |
| Age (years)                          | 50                                   | (29-67)    | 49                          | (27-77)    | 0.36            |
| Type of occupation                   |                                      |            |                             |            | <b>&lt;0.05</b> |
|                                      | <i>Farmer</i>                        | 1          | 1%                          | 0          | 0%              |
|                                      | <i>Self-employed</i>                 | 5          | 3%                          | 0          | 0%              |
|                                      | <i>Executive</i>                     | 72         | 40%                         | 3          | 4%              |
|                                      | <i>Employee</i>                      | 72         | 40%                         | 27         | 39%             |
|                                      | <i>Intermediate profession</i>       | 22         | 12%                         | 33         | 47%             |
|                                      | <i>Blue-collar worker</i>            | 2          | 1%                          | 7          | 10%             |
|                                      | NA                                   | 4          | 2%                          | 0          | 0%              |
| Personal income per month (€)        |                                      |            |                             |            | <b>&lt;0.05</b> |
|                                      | <1900                                | 71         | 40%                         | 20         | 29%             |
|                                      | >1900                                | 103        | 58%                         | 37         | 53%             |
|                                      | NA                                   | 4          | 2%                          | 13         | 19%             |
| Marital status                       |                                      |            |                             |            | <b>&lt;0.05</b> |
|                                      | <i>Single</i>                        | 34         | 19%                         | 18         | 26%             |
|                                      | <i>Married</i>                       | 110        | 62%                         | 39         | 56%             |
|                                      | <i>Divorced</i>                      | 29         | 16%                         | 10         | 14%             |
|                                      | <i>Widow</i>                         | 2          | 1%                          | 1          | 1%              |
|                                      | NA                                   | 3          | 2%                          | 2          | 3%              |
| <b>Breast cancer characteristics</b> |                                      |            |                             |            |                 |
| Type of cancer                       |                                      |            |                             |            | 0.32            |
|                                      | <i>Invasive</i>                      | 156        | 87,6%                       | 61         | 87%             |
|                                      | <i>In situ</i>                       | 21         | 11,8%                       | 9          | 13%             |
| Lymph node involvement               |                                      |            |                             |            | 0.12            |
|                                      | <i>Yes</i>                           | 43         | 24%                         | 23         | 33%             |
|                                      | <i>No</i>                            | 135        | 76%                         | 47         | 67%             |
| <b>Surgical patient care</b>         |                                      |            |                             |            |                 |
| Breast surgery                       |                                      |            |                             |            | <b>&lt;0.05</b> |
|                                      | <i>Conservative</i>                  | 133        | 75%                         | 46         | 66%             |
|                                      | <i>Radical</i>                       | 45         | 25%                         | 24         | 34%             |
| Lymph node surgery                   |                                      |            |                             |            | 0.48            |
|                                      | <i>Sentinel lymph node procedure</i> | 122        | 69%                         | 40         | 57%             |
|                                      | <i>Axillary dissection</i>           | 42         | 24%                         | 24         | 34%             |

|                           |                             |     |     |    |     |       |
|---------------------------|-----------------------------|-----|-----|----|-----|-------|
|                           | NA                          | 14  | 8%  | 6  | 9%  |       |
| Surgical revision         |                             |     |     |    |     | 0.24  |
|                           | Yes                         | 43  | 24% | 16 | 23% |       |
|                           | No                          | 135 | 76% | 54 | 77% |       |
| Radiotherapy              |                             |     |     |    |     | <0.05 |
|                           | Yes                         | 167 | 94% | 61 | 87% |       |
|                           | No                          | 11  | 6%  | 9  | 13% |       |
| Chemotherapy              |                             |     |     |    |     | <0.05 |
|                           | Yes                         | 92  | 52% | 33 | 47% |       |
|                           | No                          | 86  | 48% | 37 | 53% |       |
| Trastuzumab               |                             |     |     |    |     | 0.42  |
|                           | Yes                         | 24  | 13% | 9  | 13% |       |
|                           | No                          | 63  | 35% | 22 | 31% |       |
|                           | NA                          | 91  | 51% | 39 | 56% |       |
| Hormone therapy           |                             |     |     |    |     | 0.69  |
|                           | Yes                         | 129 | 72% | 49 | 70% |       |
|                           | No                          | 49  | 28% | 21 | 30% |       |
| <b>Patient management</b> |                             |     |     |    |     |       |
| Modes of diagnosis        |                             |     |     |    |     | 0.45  |
|                           | <i>Organized screening</i>  | 37  | 21% | 12 | 17% |       |
|                           | <i>Individual screening</i> | 74  | 42% | 26 | 37% |       |
|                           | <i>Clinical signs</i>       | 67  | 38% | 32 | 46% |       |
| Type of hospitalization   |                             |     |     |    |     | 0.78  |
|                           | <i>Outpatient surgery</i>   | 108 | 61% | 43 | 61% |       |
|                           | <i>Inpatient surgery</i>    | 70  | 39% | 27 | 39% |       |

**STROBE 2007 (v4) Statement—Checklist of items that should be included in reports of *cohort studies***

| Section/Topic                | Item # | Recommendation                                                                                                                                                                       | Reported on page # |
|------------------------------|--------|--------------------------------------------------------------------------------------------------------------------------------------------------------------------------------------|--------------------|
| Title and abstract           | 1      | (a) Indicate the study's design with a commonly used term in the title or the abstract                                                                                               | 1                  |
|                              |        | (b) Provide in the abstract an informative and balanced summary of what was done and what was found                                                                                  | 4 and 5            |
| <b>Introduction</b>          |        |                                                                                                                                                                                      |                    |
| Background/rationale         | 2      | Explain the scientific background and rationale for the investigation being reported                                                                                                 | 7                  |
| Objectives                   | 3      | State specific objectives, including any prespecified hypotheses                                                                                                                     | 7                  |
| <b>Methods</b>               |        |                                                                                                                                                                                      |                    |
| Study design                 | 4      | Present key elements of study design early in the paper                                                                                                                              | 8                  |
| Setting                      | 5      | Describe the setting, locations, and relevant dates, including periods of recruitment, exposure, follow-up, and data collection                                                      | 8                  |
| Participants                 | 6      | (a) Give the eligibility criteria, and the sources and methods of selection of participants. Describe methods of follow-up                                                           | 8                  |
|                              |        | (b) For matched studies, give matching criteria and number of exposed and unexposed                                                                                                  | 8                  |
| Variables                    | 7      | Clearly define all outcomes, exposures, predictors, potential confounders, and effect modifiers. Give diagnostic criteria, if applicable                                             | 9                  |
| Data sources/<br>measurement | 8*     | For each variable of interest, give sources of data and details of methods of assessment (measurement). Describe comparability of assessment methods if there is more than one group | 9                  |
| Bias                         | 9      | Describe any efforts to address potential sources of bias                                                                                                                            | 9                  |
| Study size                   | 10     | Explain how the study size was arrived at                                                                                                                                            | 9                  |
| Quantitative variables       | 11     | Explain how quantitative variables were handled in the analyses. If applicable, describe which groupings were chosen and why                                                         | 9                  |
| Statistical methods          | 12     | (a) Describe all statistical methods, including those used to control for confounding                                                                                                | 9                  |
|                              |        | (b) Describe any methods used to examine subgroups and interactions                                                                                                                  | 9                  |
|                              |        | (c) Explain how missing data were addressed                                                                                                                                          | 9                  |
|                              |        | (d) If applicable, explain how loss to follow-up was addressed                                                                                                                       | 9                  |
|                              |        | (e) Describe any sensitivity analyses                                                                                                                                                | 9                  |
| <b>Results</b>               |        |                                                                                                                                                                                      | 9                  |



|                          |     |                                                                                                                                                                                                              |                       |
|--------------------------|-----|--------------------------------------------------------------------------------------------------------------------------------------------------------------------------------------------------------------|-----------------------|
| Participants             | 13* | (a) Report numbers of individuals at each stage of study—eg numbers potentially eligible, examined for eligibility, confirmed eligible, included in the study, completing follow-up, and analysed            | 9                     |
|                          |     | (b) Give reasons for non-participation at each stage                                                                                                                                                         | 10                    |
|                          |     | (c) Consider use of a flow diagram                                                                                                                                                                           | Supplemental figure 1 |
| Descriptive data         | 14* | (a) Give characteristics of study participants (eg demographic, clinical, social) and information on exposures and potential confounders                                                                     | 10 and 11             |
|                          |     | (b) Indicate number of participants with missing data for each variable of interest                                                                                                                          | 11                    |
|                          |     | (c) Summarise follow-up time (eg, average and total amount)                                                                                                                                                  | 11                    |
| Outcome data             | 15* | Report numbers of outcome events or summary measures over time                                                                                                                                               | 11                    |
| Main results             | 16  | (a) Give unadjusted estimates and, if applicable, confounder-adjusted estimates and their precision (eg, 95% confidence interval). Make clear which confounders were adjusted for and why they were included | 12-14                 |
|                          |     | (b) Report category boundaries when continuous variables were categorized                                                                                                                                    | 12-14                 |
|                          |     | (c) If relevant, consider translating estimates of relative risk into absolute risk for a meaningful time period                                                                                             | 12-14                 |
| Other analyses           | 17  | Report other analyses done—eg analyses of subgroups and interactions, and sensitivity analyses                                                                                                               | 13, 14                |
| <b>Discussion</b>        |     |                                                                                                                                                                                                              |                       |
| Key results              | 18  | Summarise key results with reference to study objectives                                                                                                                                                     | 16                    |
| <b>Limitations</b>       |     |                                                                                                                                                                                                              |                       |
| Interpretation           | 20  | Give a cautious overall interpretation of results considering objectives, limitations, multiplicity of analyses, results from similar studies, and other relevant evidence                                   | 16                    |
| Generalisability         | 21  | Discuss the generalisability (external validity) of the study results                                                                                                                                        | 17                    |
| <b>Other information</b> |     |                                                                                                                                                                                                              |                       |
| Funding                  | 22  | Give the source of funding and the role of the funders for the present study and, if applicable, for the original study on which the present article is based                                                | 23                    |

\*Give information separately for cases and controls in case-control studies and, if applicable, for exposed and unexposed groups in cohort and cross-sectional studies.

**Note:** An Explanation and Elaboration article discusses each checklist item and gives methodological background and published examples of transparent reporting. The STROBE checklist is best used in conjunction with this article (freely available on the Web sites of PLoS Medicine at <http://www.plosmedicine.org/>, Annals of Internal Medicine at <http://www.annals.org/>, and Epidemiology at <http://www.epidem.com/>). Information on the STROBE Initiative is available at [www.strobe-statement.org](http://www.strobe-statement.org).

# BMJ Open

## Determinants of return at work of breast cancer patients: results from the OPTISOINS01 French prospective study.

|                                 |                                                                                                                                                                                                                                                                                                                                                                                                                                                                                                                                |
|---------------------------------|--------------------------------------------------------------------------------------------------------------------------------------------------------------------------------------------------------------------------------------------------------------------------------------------------------------------------------------------------------------------------------------------------------------------------------------------------------------------------------------------------------------------------------|
| Journal:                        | <i>BMJ Open</i>                                                                                                                                                                                                                                                                                                                                                                                                                                                                                                                |
| Manuscript ID                   | bmjopen-2017-020276.R2                                                                                                                                                                                                                                                                                                                                                                                                                                                                                                         |
| Article Type:                   | Research                                                                                                                                                                                                                                                                                                                                                                                                                                                                                                                       |
| Date Submitted by the Author:   | 01-Mar-2018                                                                                                                                                                                                                                                                                                                                                                                                                                                                                                                    |
| Complete List of Authors:       | Arfi, Alexandra; Institut Curie, Surgery<br>Baffert, Sandrine; CEMKA-EVAL, Health Economist<br>Soilly, A-L; Universite de Bourgogne IUT Dijon-Auxerre, Health Economist<br>huchon, cyrille; Hôpital Poissy, Gynecology<br>Reyal, Fabien; Institut Curie, Surgery<br>Asselain, Bernard; Institut Curie, Biostatistics<br>Neffati, Souhir; Institut Curie, Clinical Research and Innovation<br>Department<br>Rouzier, Roman; Institut Curie, Surgery<br>Hequet, Delphine; Institut Curie-Centre René Huguenin, Surgical oncology |
| <b>Primary Subject Heading</b>: | Oncology                                                                                                                                                                                                                                                                                                                                                                                                                                                                                                                       |
| Secondary Subject Heading:      | Occupational and environmental medicine                                                                                                                                                                                                                                                                                                                                                                                                                                                                                        |
| Keywords:                       | Breast tumours < ONCOLOGY, OCCUPATIONAL & INDUSTRIAL MEDICINE, PUBLIC HEALTH                                                                                                                                                                                                                                                                                                                                                                                                                                                   |
|                                 |                                                                                                                                                                                                                                                                                                                                                                                                                                                                                                                                |

SCHOLARONE™  
Manuscripts

1  
2  
3 **Determinants of return at work of breast cancer patients: results from the OPTISOINS01**  
4  
5 **French prospective study.**  
6

7  
8 Authors:

9  
10  
11 Alexandra Arfi<sup>1</sup>, Sandrine Baffert<sup>2</sup>, Anne-Laure Soilly<sup>3</sup>, Cyrille Huchon<sup>4,5</sup>, Fabien Reyat<sup>1,6</sup>,  
12  
13 Bernard Asselain<sup>7</sup>, Souhir Neffati<sup>8</sup>, Roman Rouzier<sup>1,9</sup>, Delphine Héquet<sup>1,9</sup>  
14  
15

16  
17 Affiliations :

18  
19 1: Department of Surgical Oncology, Institut Curie-Centre René Huguenin, 35 Rue Dailly,  
20  
21 92210 Saint-Cloud, France  
22

23  
24 2: Health Economics, CEMKA-EVAL, Bourg-la-Reine, 43 boulevard du Maréchal-Joffre, 92340  
25  
26 Bourg-la-Reine, France  
27

28  
29 3: Health Economics, Bourgogne Franche-Comté University, EA 7467, 2 boulevard Gabriel,  
30  
31 21000 Dijon, France  
32

33  
34 4: Department of Obstetrics and Gynecology, Hôpital de Poissy-St Germain, 10 Rue du  
35  
36 Champ Gaillard, 78300 Poissy, France  
37

38  
39 5: Equipe d'Accueil 7285, Risk and Safety in Clinical Medicine for Women and Perinatal  
40  
41 Health, University Versailles-Saint-Quentin, 2 av de la source de la Bièvre, 78180 Montigny-  
42  
43 le-Bretonneux, France  
44

45  
46 6: Residual Tumor and Response to Treatment Lab, Translational Research Department,  
47  
48 Institut Curie, 75005, Paris, France  
49

50  
51 7: Department of Biostatistics, Institut Curie-Centre René Huguenin, 35 Rue Dailly, 92210  
52  
53 Saint-Cloud, France  
54

55  
56 8: Clinical Research and Innovation Department, Sponsorship division, Institut Curie, 92210  
57  
58 Saint-Cloud, France  
59

1  
2  
3 9: René-Huguenin hospital, Institut Curie, Inserm U900 – Bioinformatics, biostatistics,  
4  
5 epidemiology and computational systems. Cancer biology, 35, rue Dailly, 92210 Saint-Cloud,  
6  
7 France  
8  
9

10  
11  
12 Corresponding author:  
13

14 Delphine HEQUET  
15

16 Postal address: 35 rue Dailly, 92210 St Cloud, France  
17

18 e-mail: [delphine.hequet@gmail.com](mailto:delphine.hequet@gmail.com)  
19

20 Phone number: 0033147111515  
21  
22

23  
24  
25 Word count: 2431  
26  
27  
28  
29  
30  
31  
32  
33  
34  
35  
36  
37  
38  
39  
40  
41  
42  
43  
44  
45  
46  
47  
48  
49  
50  
51  
52  
53  
54  
55  
56  
57  
58  
59  
60

**Contributorship statement:**

Delphine Hequet, Roman Rouzier and Sandrine Baffert designed the study.

Bernard Asselain and Souhr Neffati contributed to the design and implementation of the research.

Sandrine Baffert and Anne-Laure Soilly performed the health economic analysis.

Alexandra Arfi and Delphine Hequet performed all the remaining statistical analysis and wrote the manuscript.

Cyrille Huchon and Fabien Reyal contributed to the clinical study, patients' inclusion and analysis of the results.

All the authors reviewed and approved the final version of the manuscript.

## ABSTRACT

**Introduction:** Return to work (RTW) after breast cancer (BC) is still a new field of research. The factors determining shorter sick leave duration of BC patients have not been clearly identified. The aim of this study was to describe work during BC treatment and to identify factors associated with sick leave duration.

**Materials and methods:** An observational, prospective, multicenter study was conducted among women with operable BC. A logbook was given to all working patients to record sociodemographic and work-related data over a one-year period.

**Results:** Work-related data after BC were available for 178 patients (60%). Median age at diagnosis was 50 years (27-77), 87.9% of patients had an invasive form of BC and 25.3% a lymph node involvement. 25.9% had a radical surgery and 24.2% had an axillary dissection. Radiotherapy was performed in 90.9% of patients and chemotherapy in 48.1%. Sick leave was prescribed for 165 patients (92.7%) for a median of 155 days. On univariate analysis, invasive BC ( $p=0.025$ ), lymph node involvement ( $p=0.005$ ), radical surgery ( $p=0.025$ ), axillary dissection ( $p=0.004$ ), chemotherapy ( $p<0.001$ ), personal income  $< \text{€}1,900/\text{month}$  ( $p=0.03$ ) and not having received the patient information booklet on RTW ( $p=0.047$ ) were associated with a longer duration of sick leave. On multivariate analysis, chemotherapy was associated with longer sick leave (OR: 3.5; [95%CI: 1.6-7.9];  $p=0.002$ ). The cost of sick leave to French National Health Insurance was fourfold higher in the case of chemotherapy ( $p<0.001$ ).

**Conclusion:** Advanced disease and chemotherapy are major factors that influence sick leave duration during the management of BC.

1  
2  
3 **Strengths and limitations of this study:**  
4

- 5  
6 - Prospective multicentric study  
7  
8 - Description of factors associated to long sick leave  
9  
10 - Multimodal analysis including evaluation of costs of sick leave  
11  
12 - Few qualitative information  
13  
14

15  
16  
17  
18 **Keywords:** breast cancer, return to work, absence duration, chemotherapy.  
19  
20

21  
22  
23  
24 **Data sharing statement:** No additional data available  
25

26 **Ethics:** This study was registered with ClinicalTrials.gov (Identifier: NCT02813317) and was  
27 approved by the French National ethics committee (CCTIRS Authorization No. 14.602 and  
28 CNIL DR-2014-167) covering research at all participating hospitals.  
29  
30

31 **Funding:** Delphine Hequet benefitted from a “Fondation pour la Recherche Medicale”  
32 (FDM20140630453) grant to conduct this study. This study was supported by a grant from  
33 the French National Cancer Institute (Institut National du Cancer, PRME-K2013), dedicated  
34 to economic studies of innovative techniques.  
35  
36  
37  
38  
39  
40  
41  
42  
43  
44  
45  
46  
47  
48  
49  
50  
51  
52  
53  
54  
55  
56  
57  
58  
59  
60

**What is already known on this subject?**

Return to work after breast cancer is a delicate step in the real-life reintegration. Breast cancer patients have difficulties at work even 5 years after the end of the treatments. The factors that maintain patients at work during breast cancer are rarely described.

**What this study adds?**

This prospective study describes sick leaves during the first year following the diagnosis of early breast cancer. After one year, 20% of the patients did not return to work. Chemotherapy dramatically increased the duration of sick leaves, whereas an early information on support can reduce sick leaves. Costs of sick leaves are major.



## INTRODUCTION

Improvements in early detection and treatment have resulted in an increasing number of breast cancer (BC) survivors [1]. Treatments mostly focus on curing the disease and preventing metastatic relapse. About one-third of women diagnosed with BC are under the age of 55 with a 10-year survival close to 80% [2]. Many patients therefore recover and resume their activities of daily living during or after treatment. Return to work (RTW) is an event at the end of sick leave, consisting in resuming professional activity. RTW after BC is still a new, but important aspect of survivorship research, not only from a societal point of view, as it provides financial resources for rehabilitation of cancer survivors and contributes to psychosocial well-being, including physical and mental health [3]. Some BC cancer survivors experience reduced work ability [4–8]. Difficulties at work or unemployment differ according to the type of BC treatment. Cancer treatment varies according to the stage of the disease and can include surgery, chemotherapy, radiotherapy and hormone therapy. For many cancer patients, return to work helps them to recover from treatment and also constitutes a positive step towards the future. The identification of factors that maintain patients at work during and after BC treatment could help healthcare professionals to more accurately identify patients at risk of RTW work-related difficulties in order to provide them with adapted support during BC management. The aim of this prospective study was to describe work during and after BC management and identify factors associated with either cessation or maintenance at work.

## MATERIALS AND METHODS

1  
2  
3 OPTISOINS01 was an observational, prospective, multicenter study conducted from  
4  
5 December 2014 to March 2016 among BC patients from a regional health territory. The  
6  
7 primary objective of the Optisoins01 study was to identify the main care pathway after 1  
8  
9 year of early BC and to evaluate costs from various perspectives. Return to work evaluation  
10  
11 was one of the secondary objectives of the study. The Optisoins01 study design has been  
12  
13 previously described [9]. Eight non-profit hospitals participated in the study: 3 teaching  
14  
15 hospitals, 4 general hospitals and 1 comprehensive cancer center. Inclusion criteria were:  
16  
17 women aged  $\geq 18$  years with previously untreated, first, histologically confirmed, operable  
18  
19 BC. Exclusion criteria were: metastatic, locally advanced, or inflammatory BC, previous  
20  
21 history of BC.  
22  
23  
24

25  
26 After BC diagnosis, a work and cancer information booklet had to be given to all working  
27  
28 patients. Our Institute has designed an information booklet in collaboration with  
29  
30 occupational physicians and the Paris Regional Health Insurance (Caisse Régionale  
31  
32 d'Assurance Maladie d'Île-de-France). This document includes the testimonies from  
33  
34 employees, advice and practical information to help patients anticipate difficulties and find  
35  
36 support: possibility of part-time work, career development plan, roles of occupational  
37  
38 physicians and general practitioners. The booklet is freely available online with the support  
39  
40 of the "ARC" Foundation [10].  
41  
42  
43

44  
45 After inclusion, all patients were given a logbook in which to record, throughout the year,  
46  
47 sociodemographic data (age, marital status, type of occupation, personal income...), out-of-  
48  
49 pocket health expenses and an 1-year-occupational questionnaire for employed women  
50  
51 including dates of work and absence from work during treatments, job adjustments, on-shift  
52  
53 status and the perceived quality of reintegration with standardized self-questionnaire  
54  
55 (income change, difficulties at work with co-workers and/or with superiors...). Patients were  
56  
57  
58  
59  
60

1  
2  
3 asked to fill in the questionnaire prospectively during the all study period. During the second  
4  
5 half of the year, clinical research assistants made 2 phone calls to remind patients to fill in  
6  
7 the logbook. Questionnaires were collected at the end of the study. Types of occupations  
8  
9 were classified according to the French *Institut National de la Statistique et des Etudes*  
10  
11 *Economiques (INSEE)* classification.  
12

13  
14 Two groups of patients were compared in order to determine the factors associated with  
15  
16 sick leave duration: longer sick leave (longer or equal to the median duration) and shorter  
17  
18 sick leave (shorter than the median duration). Fisher's exact test or Student's t-test were  
19  
20 used to analyze these factors. These tests were two sided with a 0.05 level of significance.  
21  
22 Multivariate analysis was performed using a logistic regression model. We considered  
23  
24 adjusted p-value for multiple comparisons. Sick leave over a 1-year period was described  
25  
26 according to whether or not the patients were treated by chemotherapy. Differences in the  
27  
28 areas under the curves of the 2 populations were compared to 1,000 permutations of  
29  
30 random allocation of chemotherapy. The same analysis was performed according to whether  
31  
32 or not the patients had received the work information booklet. Differences were considered  
33  
34 significant for  $p < 0.05$ . All statistical analyses were performed with R software [11].  
35  
36  
37

38  
39 The cost of sick leave for National Health Insurance was calculated on the basis of the  
40  
41 monthly income declared by the patients, the duration of sick leave and the national sick  
42  
43 leave allowance scale.  
44

45  
46 This study was registered with ClinicalTrials.gov (Identifier: NCT02813317) and was approved  
47  
48 by the French National ethics committee (CCTIRS Authorization No. 14.602 and CNIL DR-  
49  
50 2014-167) covering research at all participating hospitals.  
51

52  
53 Patient and public Involvement: A sample of patients participated to the questionnaire  
54  
55 development concerning work activity before implementation of the study. Patients were  
56  
57  
58  
59

involved in the study by actively completing the questionnaires during 1 year. A results report will be sent to the study participants.

## RESULTS

Six hundred and four patients with a median age of 58 years (range: 24-98) were included in the Optisoins01 study, including 297 patients (48.2%) who were working at the time of BC diagnosis. The present study focused on these 297 patients.

Detailed patient characteristics and cancer characteristics are presented in Table 1. The median age of the women was 50 (range: 27-77) years, 54 women (18.2%) were single, 153 (51.5%) were married, 39 (13.1%) were divorced and 3 (1.0%) were widows. Two hundred and sixty-one patients (87.9%) had invasive BC and 35 (11.8%) had *in situ* BC. Seventy-five women (25.3%) presented axillary lymph node involvement.

Table 1: Patient and cancer characteristics and breast cancer treatments (n=297)

|                                      | n or median | % or range |
|--------------------------------------|-------------|------------|
| <b>Patient characteristics</b>       |             |            |
| Age (years)                          | 50          | (27-77)    |
| Marital status                       |             |            |
| <i>Single</i>                        | 54          | 18.2%      |
| <i>Married</i>                       | 153         | 51.5%      |
| <i>Divorced</i>                      | 39          | 13.1%      |
| <i>Widow</i>                         | 3           | 1%         |
| <i>NA</i>                            | 48          | 16.2%      |
| <b>Breast cancer characteristics</b> |             |            |
| Modes of diagnosis                   |             |            |
| <i>Organized screening</i>           | 60          | 20.2%      |
| <i>Individual screening</i>          | 114         | 38.4%      |
| <i>Clinical signs</i>                | 123         | 41.4%      |
| Type of cancer                       |             |            |
| <i>Invasive</i>                      | 261         | 87.9%      |
| <i>In situ</i>                       | 35          | 11.8%      |
| <i>NA</i>                            | 1           | 0.3%       |

|                           |                                      |     |       |
|---------------------------|--------------------------------------|-----|-------|
| Lymph node involvement    |                                      |     |       |
|                           | Yes                                  | 75  | 25.3% |
|                           | No                                   | 222 | 74.7% |
| <b>Surgery</b>            |                                      |     |       |
| Breast surgery            |                                      |     |       |
|                           | <i>Conservative</i>                  | 220 | 74.1% |
|                           | <i>Radical</i>                       | 77  | 25.9% |
| Lymph node surgery        |                                      |     |       |
|                           | <i>Sentinel lymph node procedure</i> | 203 | 68.4% |
|                           | <i>Axillary dissection</i>           | 72  | 24.2% |
|                           | NA                                   | 22  | 7.4%  |
| Surgical revision         |                                      |     |       |
|                           | <i>no</i>                            | 227 | 76.4% |
|                           | <i>1</i>                             | 60  | 20.2% |
|                           | <i>&gt;1</i>                         | 10  | 3.4%  |
| Type of hospitalization   |                                      |     |       |
|                           | <i>Outpatient surgery</i>            | 107 | 36%   |
|                           | <i>Conventional surgery</i>          | 190 | 64%   |
| <b>Adjuvant therapies</b> |                                      |     |       |
| Radiotherapy              |                                      |     |       |
|                           | No                                   | 27  | 9.1%  |
|                           | Yes                                  | 270 | 90.9% |
| Chemotherapy              |                                      |     |       |
|                           | Yes                                  | 143 | 48.1% |
|                           | No                                   | 154 | 51.9% |
| Trastuzumab               |                                      |     |       |
|                           | Yes                                  | 36  | 12.1% |
|                           | No                                   | 100 | 33.7% |
|                           | NA                                   | 161 | 54.2% |
| Hormone therapy           |                                      |     |       |
|                           | Yes                                  | 220 | 74.1% |
|                           | No                                   | 77  | 25.9% |

Two hundred and twenty women (74.1%) underwent breast-conserving surgery and 77 (25.9%) underwent radical mastectomy (Table 1). A sentinel lymph node procedure was performed for 203 patients (68.4%). Seventy patients required at least 1 reoperation for the following reasons: positive surgical margins and secondary mastectomy, sentinel lymph

node procedure following discovery of an invasive tumor, axillary dissection following positive sentinel lymph node biopsy and surgical complications (abscess, hematoma, etc.). After surgery, 90.9% of patients received radiotherapy 48.1% of patients received adjuvant chemotherapy and 74.1% of patients received hormone therapy.

Most patients were executives (31.4%) or employees (33.3%). Most patients (47.1%) had a monthly income > €1,900. Work data after BC were available for 178 patients (60%, supplemental Figure 1). Patients who did not complete the 1-year work questionnaire in the logbook during one year were globally less compliant with the study and less medicalized (supplemental table 1). Sick leave was prescribed for 165 patients (92.7%). Patients had only one sick leave in 52.2% of cases, 2 sick leaves in 21.9% of cases and 3 or more sick leaves in 18.5% of cases. Median duration of sick leave was 155 days (range: 5-365). After treatment, 7 patients (3.9%) lost their jobs and 46.1% had reduced income. Patients encountered difficulties with their co-workers in 3.4% of cases, with their superiors in 3.9% of cases and for undocumented reasons in 12.9% of cases. Work-related factors are summarized in Table 2.

Table 2: Work characteristics before and after BC

|                                                         | n or median | % or range |
|---------------------------------------------------------|-------------|------------|
| <b>Work characteristics before breast cancer, n=297</b> |             |            |
| Type of occupation                                      |             |            |
| <i>Farmer</i>                                           | 1           | 0.3%       |
| <i>Self-employed</i>                                    | 8           | 2.5%       |
| <i>Executive</i>                                        | 99          | 31.4%      |
| <i>Employee</i>                                         | 105         | 33.3%      |
| <i>Intermediate profession</i>                          | 29          | 9.2%       |
| <i>Blue-collar worker</i>                               | 2           | 0.6%       |
| <i>NA</i>                                               | 53          | 22.9%      |
| Personal income per month (€)                           |             |            |
| <i>no income</i>                                        | 6           | 2%         |

|                                                        |                       |     |         |
|--------------------------------------------------------|-----------------------|-----|---------|
|                                                        | <b>&lt; 1900</b>      | 104 | 35%     |
|                                                        | <b>&gt;1900</b>       | 140 | 47.1%   |
|                                                        | <i>NA</i>             | 47  | 15.8%   |
| <b>Work characteristics after breast cancer, n=178</b> |                       |     |         |
| Dismissal                                              |                       | 7   | 3.9%    |
| Income change                                          |                       |     |         |
|                                                        | <i>decreased</i>      | 82  | 46.1%   |
|                                                        | <i>increased</i>      | 3   | 1.7%    |
|                                                        | <i>stable</i>         | 73  | 41%     |
|                                                        | <i>NA</i>             | 20  | 11.2%   |
| Decreased income (%), n=82                             |                       |     |         |
|                                                        | <i>&lt;10%</i>        | 37  | 45.1%   |
|                                                        | <i>10-30%</i>         | 13  | 15.8%   |
|                                                        | <i>30-60%</i>         | 5   | 6.1%    |
|                                                        | <i>&gt;60%</i>        | 3   | 3.7%    |
|                                                        | <i>NA</i>             | 24  | 29.3%   |
| Sick leave                                             |                       |     |         |
|                                                        | <i>Yes</i>            | 165 | 92.7%   |
|                                                        | <i>No</i>             | 13  | 7.3%    |
| Number of sick leaves (n=165)                          |                       |     |         |
|                                                        | <i>1</i>              | 93  | 52.2%   |
|                                                        | <i>2</i>              | 39  | 21.9%   |
|                                                        | <i>&gt;2</i>          | 33  | 18.5%   |
| Duration of sick leave (days)                          |                       | 155 | (5-365) |
| Difficulties at work (n=36)                            |                       |     |         |
|                                                        | <i>with coworkers</i> | 6   | 3.4%    |
|                                                        | <i>with superiors</i> | 7   | 3.9%    |
|                                                        | <i>other</i>          | 23  | 12.9%   |

On univariate analysis, the presence of clinical signs leading to a diagnosis of BC ( $p<0.001$ ), an invasive form of BC ( $p=0.02$ ), lymph node involvement ( $p=0.005$ ), radical surgery ( $p=0.02$ ), axillary dissection ( $p<0.001$ ), chemotherapy ( $p<0.001$ ), personal income  $< \text{€}1,900/\text{month}$  ( $p=0.03$ ) and not having received the work and cancer information booklet ( $p=0.047$ ) were associated with a longer total duration of sick leave (Table 3). Moreover, patients with

longer sick leave were more likely to have reduced income after treatment of their disease  
(p=0.0012).

Table 3: Determinants and consequences of long sick leave

|                                      | Sick leave <155 days, n=79 |            | Sick leave ≥155, days n=77 |              | p                |
|--------------------------------------|----------------------------|------------|----------------------------|--------------|------------------|
|                                      | n or median                | % or range | n or median                | % or range   |                  |
| <b>Patient characteristics</b>       |                            |            |                            |              |                  |
| Age (years)                          | 50.6                       | (27-59)    | 50                         | (29-77)      | 0.52             |
| Type of occupation                   |                            |            |                            |              | 0.09             |
| <i>Farmer</i>                        | 0                          | 0%         | 0                          | 0%           |                  |
| <i>Self-employed</i>                 | 3                          | 3.8%       | 1                          | 1.3%         |                  |
| <i>Executive</i>                     | 36                         | 45.6%      | 29                         | 37.7%        |                  |
| <i>Employee</i>                      | 25                         | 31.6%      | 38                         | 49.4%        |                  |
| <i>Intermediate profession</i>       | 13                         | 16.5%      | 7                          | 9.1%         |                  |
| <i>Blue-collar worker</i>            | 1                          | 1.3%       | 0                          | 0%           |                  |
| NA                                   | 1                          | 1.3%       | 2                          |              |                  |
| Personal income per month (€)        |                            |            |                            |              | <b>0.03</b>      |
| < 1900                               | 25                         | 31.6%      | 37                         | 48.1%        |                  |
| > 1900                               | 54                         | 68.4%      | 38                         | 49.4%        |                  |
| NA                                   | 0                          | 0%         | 2                          | 2.6%         |                  |
| Marital status                       |                            |            |                            |              | 0.76             |
| <i>Single</i>                        | 18                         | 22.8%      | 12                         | 15.6%        |                  |
| <i>Married</i>                       | 47                         | 59.5%      | 49                         | 63.6%        |                  |
| <i>Divorced</i>                      | 12                         | 15.2%      | 14                         | 18.2%        |                  |
| <i>Widow</i>                         | 1                          | 1.3%       | 1                          | 1.3%         |                  |
| NA                                   | 1                          | 1.3%       | 1                          | 1.3%         |                  |
| <b>Breast cancer characteristics</b> |                            |            |                            |              |                  |
| Type of cancer                       |                            |            |                            |              | <b>&lt;0.001</b> |
| <i>Invasive</i>                      | 63                         | 79.7%      | 74                         | 96.1%        |                  |
| <i>In situ</i>                       | 16                         | 20.3%      | 3                          | 3.9%         |                  |
| Lymph node involvement               |                            |            |                            |              | <b>0.005</b>     |
| Yes                                  | 11                         | 13.9%      | <b>26</b>                  | <b>33.8%</b> |                  |
| No                                   | 68                         | 86.1%      | <b>52</b>                  | <b>67.5%</b> |                  |
| <b>Surgery</b>                       |                            |            |                            |              |                  |
| Breast surgery                       |                            |            |                            |              | <b>0.02</b>      |
| <i>Conservative</i>                  | 66                         | 83.5%      | 50                         | 64.9%        |                  |
| <i>Radical</i>                       | 13                         | 16.5%      | 27                         | 35.1%        |                  |
| Lymph node surgery                   |                            |            |                            |              | <b>&lt;0.001</b> |



|    |                                      |    |       |    |       |        |
|----|--------------------------------------|----|-------|----|-------|--------|
| 1  |                                      |    |       |    |       |        |
| 2  |                                      |    |       |    |       |        |
| 3  | <i>Sentinel lymph node procedure</i> | 62 | 78.5% | 48 | 62.3% |        |
| 4  | <i>Axillary dissection</i>           | 9  | 11.4% | 26 | 33.8% |        |
| 5  | NA                                   | 8  | 10.1% | 3  | 3.9%  |        |
| 6  |                                      |    |       |    |       |        |
| 7  |                                      |    |       |    |       |        |
| 8  | Surgical revision                    |    |       |    |       | 0.06   |
| 9  | Yes                                  | 13 | 16.5% | 23 | 29.9% |        |
| 10 | No                                   | 66 | 83.5% | 54 | 70.1% |        |
| 11 |                                      |    |       |    |       |        |
| 12 | Radiotherapy                         |    |       |    |       | 0.53   |
| 13 | Yes                                  | 72 | 91.1% | 74 | 96.1% |        |
| 14 | No                                   | 7  | 8.9%  | 3  | 3.9%  |        |
| 15 |                                      |    |       |    |       |        |
| 16 | Chemotherapy                         |    |       |    |       | <0.001 |
| 17 | Yes                                  | 25 | 31.6% | 56 | 72.7% |        |
| 18 | No                                   | 54 | 68.4% | 21 | 27.3% |        |
| 19 |                                      |    |       |    |       |        |
| 20 | Trastuzumab                          |    |       |    |       | 0.54   |
| 21 | Yes                                  | 9  | 11.4% | 12 | 15.6% |        |
| 22 | No                                   | 16 | 20.3% | 40 | 51.9% |        |
| 23 | NA                                   | 54 | 68.4% | 25 | 32.5% |        |
| 24 |                                      |    |       |    |       |        |
| 25 | Hormone therapy                      |    |       |    |       | 0.05   |
| 26 | Yes                                  | 50 | 63.3% | 61 | 79.2% |        |
| 27 | No                                   | 29 | 36.7% | 16 | 20.8% |        |
| 28 | <b>Patient management</b>            |    |       |    |       |        |
| 29 | Modes of diagnosis                   |    |       |    |       | <0.001 |
| 30 | <i>Organized screening</i>           | 15 | 19%   | 21 | 27.3% |        |
| 31 | <i>Individual screening</i>          | 43 | 54.4% | 20 | 26%   |        |
| 32 | <i>Clinical signs</i>                | 21 | 26.6% | 36 | 46.8% |        |
| 33 |                                      |    |       |    |       |        |
| 34 | Type of hospitalization              |    |       |    |       | <0.001 |
| 35 | <i>Outpatient surgery</i>            | 58 | 73.4% | 34 | 44.2% |        |
| 36 | <i>Inpatient surgery</i>             | 21 | 26.6% | 43 | 55.8% |        |
| 37 |                                      |    |       |    |       |        |
| 38 | Work and cancer information booklet  |    |       |    |       |        |
| 39 |                                      |    |       |    |       |        |
| 40 | Yes                                  | 64 | 81%   | 52 | 67.5% | 0.047  |
| 41 | No                                   | 15 | 19%   | 25 | 32.5% |        |
| 42 |                                      |    |       |    |       |        |
| 43 | <b>Return to work</b>                |    |       |    |       |        |
| 44 |                                      |    |       |    |       |        |
| 45 | Dismissal                            | 1  | 1.3%  | 3  | 3.9%  | 0.62   |
| 46 | Income change                        |    |       |    |       |        |
| 47 | <i>decreased</i>                     | 23 | 29.1% | 48 | 62.3% | <0.001 |
| 48 | <i>increased</i>                     | 0  | 0%    | 2  | 2.6%  |        |
| 49 | <i>stable</i>                        | 37 | 46.8% | 24 | 31.2% |        |
| 50 | NA                                   | 19 | 24.1% | 3  | 3.9%  |        |
| 51 |                                      |    |       |    |       |        |
| 52 | Decreased income (%)                 |    |       |    |       | 0.61   |
| 53 | <10%                                 | 11 | 13.9% | 21 | 27.3% |        |
| 54 | 10-30%                               | 4  | 5.1%  | 7  | 9.1%  |        |
| 55 | 30-60%                               | 0  | 0%    | 4  | 5.2%  |        |
| 56 |                                      |    |       |    |       |        |
| 57 |                                      |    |       |    |       |        |
| 58 |                                      |    |       |    |       |        |
| 59 |                                      |    |       |    |       |        |
| 60 |                                      |    |       |    |       |        |

|                      |                       |    |      |    |       |      |
|----------------------|-----------------------|----|------|----|-------|------|
|                      | >60%                  | 0  | 0%   | 3  | 3.9%  |      |
|                      | NA                    | 64 | 81%  | 42 | 54.5% |      |
| Difficulties at work |                       |    |      |    |       |      |
|                      | <i>with coworkers</i> | 2  | 2.5% | 3  | 3.9%  | 0.67 |
|                      | <i>with superiors</i> | 0  | 0%   | 6  | 7.8%  | 0.17 |
|                      | <i>other</i>          | 7  | 8.9% | 14 | 18.2% | 0.93 |

On multivariate analysis, chemotherapy was the only independent factor associated with longer sick leave (OR: 3.5, [95%CI: 1.6-7.9], p=0.002). Patients treated by chemotherapy had longer sick leave than those not treated by chemotherapy (Figure 1). The difference in terms of the 1-year distribution of sick leave was not statistically significant between patients according to whether or not they had received the work information booklet (Figure 2).

Considering the working population of OPTISOINS01 study with complete data on sick leave and salary, the median cost of sick leave for National Health Insurance was €8,841 per patient per year from diagnosis. In univariate and multivariate analysis, the only determinant of sick leave costs found in this study was the administration of chemotherapy, with a fourfold higher median allowance for patients treated with adjuvant chemotherapy.

## DISCUSSION

Although many BC cancer survivors are able to return to a normal work life after treatment, our study confirms that many women of working ages do not. Sick leave is frequently prescribed and is often long, with a median sick leave of 155 days in this study.

Factors associated with long sick leave (>155 days) were severe or advanced forms of BC. The duration of sick leave was also associated with the mode of diagnosis, as patients diagnosed by breast screening presented shorter sick leaves. Public health authorities should

1  
2  
3 therefore promote breast screening in order to decrease the proportion of advanced forms  
4  
5 of BC and aggressive therapies with severe consequences on work and personal activities.  
6  
7 Consequently, longer sick leave was also associated with more aggressive therapy, such as  
8  
9 radical surgery, axillary dissection, and chemotherapy. These results are similar to those  
10  
11 published in the literature [4,7,8,12,13]. Chemotherapy is an aggressive treatment that can  
12  
13 be necessary in order to improve survival, but which has long-lasting consequences in terms  
14  
15 of self-esteem (alopecia...), chronic pain (neuropathy...), and chronic fatigue, that play an  
16  
17 important role in return to work and maintenance at work [6]. BC survivors may have to deal  
18  
19 with the side effects specific to this type of treatment. Although many side effects of  
20  
21 chemotherapy are only temporary [14], some studies have shown that chemotherapy may  
22  
23 impact on cognitive functioning [15] and fatigue [16] up to 10 years after diagnosis.  
24  
25 Cognitive functioning and fatigue have both been associated with impaired work functioning  
26  
27 [17]. Munir et al [18] reported that up to 62–84% of women resumed work either during  
28  
29 treatment with chemotherapy or following completion of treatment. As a result of their  
30  
31 cognitive limitations, women reported that they experienced difficulties with their work  
32  
33 ability, particularly difficulties doing multiple tasks, reduced clarity of decisions, deficits in  
34  
35 clear thinking and feelings of being inept due to short-term memory [19]. Rapid progress is  
36  
37 being made in the field of chemotherapy with the routine use of new genomic signature  
38  
39 tests that allow more accurate targeting of patient likely to benefit from chemotherapy.  
40  
41 According to Nesvold et al [20] and Eaker et al [14] mastectomy and axillary lymph node  
42  
43 dissection may influence working life long after treatment due to an increased risk of chronic  
44  
45 pain. BC survivors are more likely to suffer from upper extremity impairments or  
46  
47 lymphedema than are other cancer survivors [21–24], which are responsible for difficulties  
48  
49 returning to work [25,26].  
50  
51  
52  
53  
54  
55  
56  
57  
58  
59  
60

1  
2  
3 The work and cancer information booklet appeared to help patients return to work with  
4 significantly shorter sick leave in univariate analysis, but not in the multivariate analysis.  
5  
6 However, this suggests that an action, such as an active support, could help to reduce sick  
7  
8 leave duration. The information booklet advises women to attend the occupational medicine  
9  
10 service. In France, occupational medicine plays an essential role, but the patient is not  
11  
12 obliged to consult the occupational physician when sick leave is < 3 months. However, at 3  
13  
14 months, the occupational physician and the employee must determine the modalities of  
15  
16 return to work, based on the employee's state of health and the characteristics of the  
17  
18 workplace. These arrangements concern the employee himself and the work collective with,  
19  
20 if necessary, actions so that the reception is assured to the return. Setting up of a schedule,  
21  
22 reduction of working hours, modification of physical, mental or workplace loads can also be  
23  
24 instituted at the time of return to work. The occupational physician can provide  
25  
26 recommendations to the employer, unless the employer refuses. The results obtained with  
27  
28 this handbook are particularly encouraging and suggest that more individual supports should  
29  
30 be developed. Health coaching by telephone and/or face-to-face interview have already  
31  
32 been tested [27–29], showing positive significant outcomes on physical activity, body mass  
33  
34 index, pain management, acceptance of disease and self-confidence among cancer survivors.  
35  
36 Coaching methods have never been tested in the management of working patients during  
37  
38 cancer treatment maintenance. Our Institute is therefore setting up a prospective  
39  
40 randomized study (OPTICOACH) with tailored support intervention to enhance RTW after BC  
41  
42 in collaboration with a professional coach, consisting of individual interviews or small group  
43  
44 workshops over a period of 3 years.

45  
46  
47 Difficulties returning to work appear to extend over a period of many years. Sevellec et al  
48  
49 [28] showed that, six years after returning to work, one employee out of two was still  
50  
51  
52

1  
2  
3 working in the same company. Rather than disappearing, the difficulties identified many  
4  
5 years after BC persist for a long time after stopping treatment. It is therefore essential to  
6  
7 identify the factors associated with longer sick leave and RTW difficulties in order to help  
8  
9 working patients and prevent these long-term problems. The VICAN 2 study [29] focused  
10  
11 on the factors associated to difficulties at RTW. This large study was carried out in 2014 by  
12  
13 the French National Cancer Institute, on the living conditions of people with cancer (not  
14  
15 only BC), two years after the diagnosis. The people most vulnerable to job loss two years  
16  
17 after the cancer diagnosis are mainly those working in the so-called socio-professional  
18  
19 execution categories, the youngest and oldest, married people with a level of education  
20  
21 below the baccalaureate level, and those with precarious contracts.  
22  
23

24  
25 One of the potential biases of this study concerns the characteristics of the study  
26  
27 population, as almost the majority of women belonged to the wealthiest social classes, as  
28  
29 45.6% of patients were executives and only 1.3% were blue collar workers. More than  
30  
31 sixty-eight percent of patients had a personal monthly income > €1,900 and 36.7% had a  
32  
33 personal monthly income > €2,600. This distribution does not exactly reflect French  
34  
35 society; in France, according to the INSEE statistics of 2014, the median monthly income  
36  
37 was €1,772. Similarly to our results, a Canadian team [30] has shown that women with an  
38  
39 annual income less than C\$20,000 were less likely to return to work than those whose  
40  
41 income exceeded C\$50,000. The French social protection system also plays a role, as it  
42  
43 provides cancer survivors with the possibility of replacement income, allowing women to  
44  
45 decide whether or not they wish to return to work immediately. Providing assistance and  
46  
47 support to all working patients should therefore be a priority.  
48  
49  
50  
51  
52  
53  
54

## 55 **CONCLUSION**

56  
57  
58  
59  
60

1  
2  
3 Advanced disease and chemotherapy are major factors that influence return to work with  
4 longer sick-leave. Systematic screening or use of innovative tools, such as genomic  
5 signatures, can facilitate earlier diagnosis and reduce aggressive therapies.  
6  
7

8  
9  
10 Depending on the type of treatment, on the stage of the disease and on the type of  
11 occupation, information and coaching methods with the occupational medicine service  
12 should systematically be given to working women, helping them to anticipate job  
13 adjustments with flexibility of work schedule for example.  
14  
15  
16  
17

18  
19 Personalized coaching methods have been successfully used to promote acceptance of  
20 disease and self-confidence and should be tested in the management of return to work.  
21  
22  
23  
24  
25  
26  
27  
28  
29  
30  
31  
32  
33  
34  
35  
36  
37  
38  
39  
40  
41  
42  
43  
44  
45  
46  
47  
48  
49  
50  
51  
52  
53  
54  
55  
56  
57  
58  
59  
60

**Figures:**

Figure 1: Percentage of patients on sick leave at 1-year follow-up depending on the presence or absence of chemotherapy

Figure 2: Percentage of patients on sick leave at 1-year follow-up depending on whether or not they had been given the work information booklet

Supplemental Figure 1: Flow Chart

**Competing Interests:** The authors declare that they have no competing interests.

**Funding:** This study was supported by a grant from the French National Cancer Institute dedicated to economic studies of innovative techniques. Delphine Héquet benefit from a grant of “Fondation pour la Recherche Médicale” to conduct this study.

**REFERENCES**

- 1 Breast Cancer Facts & figures 2013-2014 (2013) Atlanta: American Cancer Society, Inc. <http://cancer.org/acs/groups/content/@research/documents/document/acspc-042725.pdf>. Accessed 9/20/2014.
- 2 Verdecchia A, Francisci S, Brenner H, *et al.* Recent cancer survival in Europe: a 2000-02 period analysis of EURO CARE-4 data. *Lancet Oncol* 2007;**8**:784–96. doi:10.1016/S1470-2045(07)70246-2
- 3 Mehnert A, de Boer A, Feuerstein M. Employment challenges for cancer survivors: Employment Challenges. *Cancer* 2013;**119**:2151–9. doi:10.1002/cncr.28067
- 4 Balak F, Roelen CAM, Koopmans PC, *et al.* Return to work after early-stage breast cancer: a cohort study into the effects of treatment and cancer-related symptoms. *J Occup Rehabil* 2008;**18**:267–72. doi:10.1007/s10926-008-9146-z
- 5 de Boer AGEM, Taskila TK, Tamminga SJ, *et al.* Interventions to enhance return-to-work for cancer patients. *Cochrane Database Syst Rev* 2015;:CD007569. doi:10.1002/14651858.CD007569.pub3

- 6 Fantoni SQ, Peugniez C, Duhamel A, *et al.* Factors related to return to work by women with breast cancer in northern France. *J Occup Rehabil* 2010;**20**:49–58. doi:10.1007/s10926-009-9215-y
- 7 Hedayati E, Johnsson A, Alinaghizadeh H, *et al.* Cognitive, psychosocial, somatic and treatment factors predicting return to work after breast cancer treatment. *Scand J Caring Sci* 2013;**27**:380–7. doi:10.1111/j.1471-6712.2012.01046.x
- 8 Lavigne JE, Griggs JJ, Tu XM, *et al.* Hot flashes, fatigue, treatment exposures and work productivity in breast cancer survivors. *J Cancer Surviv Res Pract* 2008;**2**:296–302. doi:10.1007/s11764-008-0072-z
- 9 Baffert S, Hoang HL, Brédart A, *et al.* The patient-breast cancer care pathway: how could it be optimized? *BMC Cancer* 2015;**15**:394. doi:10.1186/s12885-015-1417-4
- 10 <https://www.fondation-arc.org/support-information/brochure-retour-au-travail-apres-cancer>.
- 11 R Core Team (2012) R: a language and environment for statistical computing. R Foundation for Statistical Computing, Vienna, Austria; ISBN 3-900051-07-0. Available at: <http://www.R-project.org/> [<http://lib.stat.cmu.edu/r/CRAN>]. (last accessed 20 November 2016).
- 12 Jaggi R, Hawley ST, Abrahamse P, *et al.* Impact of adjuvant chemotherapy on long-term employment of survivors of early-stage breast cancer. *Cancer* 2014;**120**:1854–62. doi:10.1002/cncr.28607
- 13 Johnsson A, Fornander T, Rutqvist L-E, *et al.* Predictors of return to work ten months after primary breast cancer surgery. *Acta Oncol Stockh Swed* 2009;**48**:93–8. doi:10.1080/02841860802477899
- 14 Eaker S, Wigertz A, Lambert PC, *et al.* Breast cancer, sickness absence, income and marital status. A study on life situation 1 year prior diagnosis compared to 3 and 5 years after diagnosis. *PLoS One* 2011;**6**:e18040. doi:10.1371/journal.pone.0018040
- 15 de Ruiter MB, Reneman L, Boogerd W, *et al.* Cerebral hypo-responsiveness and cognitive impairment 10 years after chemotherapy for breast cancer. *Hum Brain Mapp* 2011;**32**:1206–19. doi:10.1002/hbm.21102
- 16 Reinertsen KV, Cvancarova M, Loge JH, *et al.* Predictors and course of chronic fatigue in long-term breast cancer survivors. *J Cancer Surviv Res Pract* 2010;**4**:405–14. doi:10.1007/s11764-010-0145-7
- 17 Islam T, Dahlui M, Majid HA, *et al.* Factors associated with return to work of breast cancer survivors: a systematic review. *BMC Public Health* 2014;**14 Suppl 3**:S8. doi:10.1186/1471-2458-14-S3-S8



- 1  
2  
3 18 Munir F, Burrows J, Yarker J, *et al.* Women's perceptions of chemotherapy-induced  
4 cognitive side effects on work ability: a focus group study. *J Clin Nurs* 2010;**19**:1362–70.  
5 doi:10.1111/j.1365-2702.2009.03006.x  
6  
7 19 Hoving J, Broekhuizen M, Frings-Dresen M. Return to work of breast cancer survivors: a  
8 systematic review of intervention studies. *BMC Cancer* 2009;**9**. doi:10.1186/1471-2407-  
9 9-117  
10  
11 20 Nesvold I-L, Fosså SD, Holm I, *et al.* Arm/shoulder problems in breast cancer survivors  
12 are associated with reduced health and poorer physical quality of life. *Acta Oncol Stockh*  
13 *Swed* 2010;**49**:347–53. doi:10.3109/02841860903302905  
14  
15 21 Assis MR, Marx AG, Magna LA, *et al.* Late morbidity in upper limb function and quality of  
16 life in women after breast cancer surgery. *Braz J Phys Ther* 2013;**17**:236–43.  
17  
18 22 Devoogdt N, Van Kampen M, Christiaens MR, *et al.* Short- and long-term recovery of  
19 upper limb function after axillary lymph node dissection. *Eur J Cancer Care (Engl)*  
20 2011;**20**:77–86. doi:10.1111/j.1365-2354.2009.01141.x  
21  
22 23 Hayes SC, Rye S, Battistutta D, *et al.* Upper-body morbidity following breast cancer  
23 treatment is common, may persist longer-term and adversely influences quality of life.  
24 *Health Qual Life Outcomes* 2010;**8**:92. doi:10.1186/1477-7525-8-92  
25  
26 24 Stubblefield MD, Keole N. Upper body pain and functional disorders in patients with  
27 breast cancer. *PM R* 2014;**6**:170–83. doi:10.1016/j.pmrj.2013.08.605  
28  
29 25 Boyages J, Kalfa S, Xu Y, *et al.* Worse and worse off: the impact of lymphedema on work  
30 and career after breast cancer. *SpringerPlus* 2016;**5**:657. doi:10.1186/s40064-016-2300-  
31 8  
32  
33 26 Peugniez C, Fantoni S, Leroyer A, *et al.* Return to work after treatment for breast cancer:  
34 single-center experience in a cohort of 273 patients. *Ann Oncol Off J Eur Soc Med Oncol*  
35 2010;**21**:2124–5. doi:10.1093/annonc/mdq556  
36  
37 27 Hawkes AL, Gollschewski S, Lynch BM, *et al.* A telephone-delivered lifestyle intervention  
38 for colorectal cancer survivors “CanChange”: a pilot study. *Psychooncology* 2009;**18**:449–  
39 55. doi:10.1002/pon.1527  
40  
41 28 Sevellec M, Belin L, Bourrillon M-F, *et al.* [Work ability in cancer patients: Six years  
42 assessment after diagnosis in a cohort of 153 workers]. *Bull Cancer (Paris)* 2015;**102**:S5-  
43 13. doi:10.1016/S0007-4551(15)31212-1  
44  
45 29 VICAN2- [https://www.inserm.fr/.../rapport\\_complet\\_la-vie-2-ans-apres-un-diagnostic-](https://www.inserm.fr/.../rapport_complet_la-vie-2-ans-apres-un-diagnostic-de-cancer-2014)  
46 [de-cancer-2014.](https://www.inserm.fr/.../rapport_complet_la-vie-2-ans-apres-un-diagnostic-de-cancer-2014)  
47  
48 30 Drolet M, Maunsell E, Brisson J, *et al.* Not working 3 years after breast cancer: predictors  
49 in a population-based study. *J Clin Oncol Off J Am Soc Clin Oncol* 2005;**23**:8305–12.  
50 doi:10.1200/JCO.2005.09.500  
51  
52  
53  
54  
55  
56  
57  
58  
59



Figure 1: Percentage of patients on sick leave at 1-year follow-up depending on the presence or absence of chemotherapy

264x200mm (300 x 300 DPI)

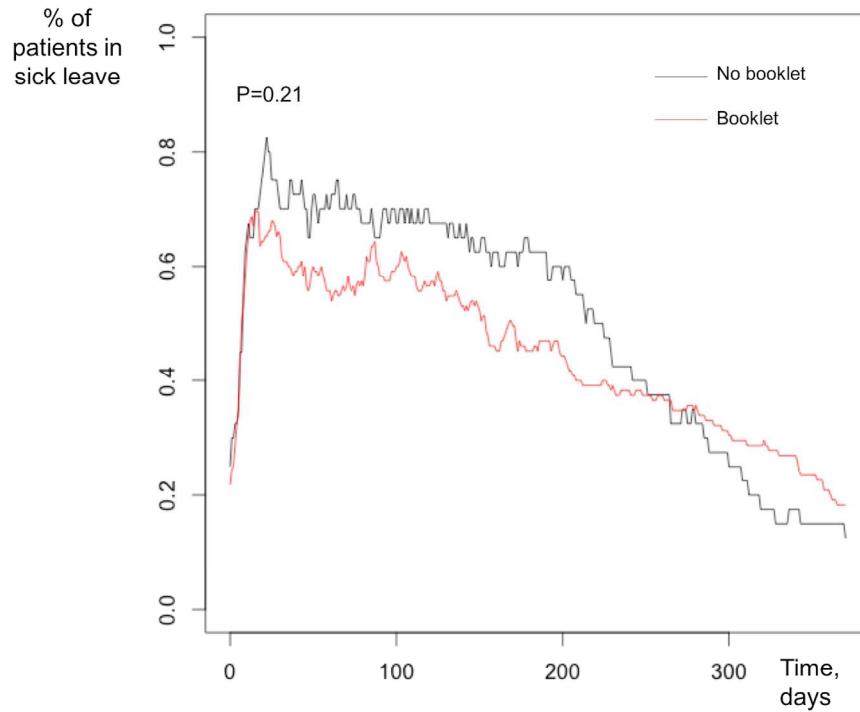

Figure 2: Percentage of patients on sick leave at 1-year follow-up depending on whether or not they had been given the work information booklet

262x205mm (300 x 300 DPI)

only

1  
2  
3  
4  
5  
6  
7  
8  
9  
10  
11  
12  
13  
14  
15  
16  
17  
18  
19  
20  
21  
22  
23  
24  
25  
26  
27  
28  
29  
30  
31  
32  
33  
34  
35  
36  
37  
38  
39  
40  
41  
42  
43  
44  
45  
46  
47  
48  
49  
50  
51  
52  
53  
54  
55  
56  
57  
58  
59  
60

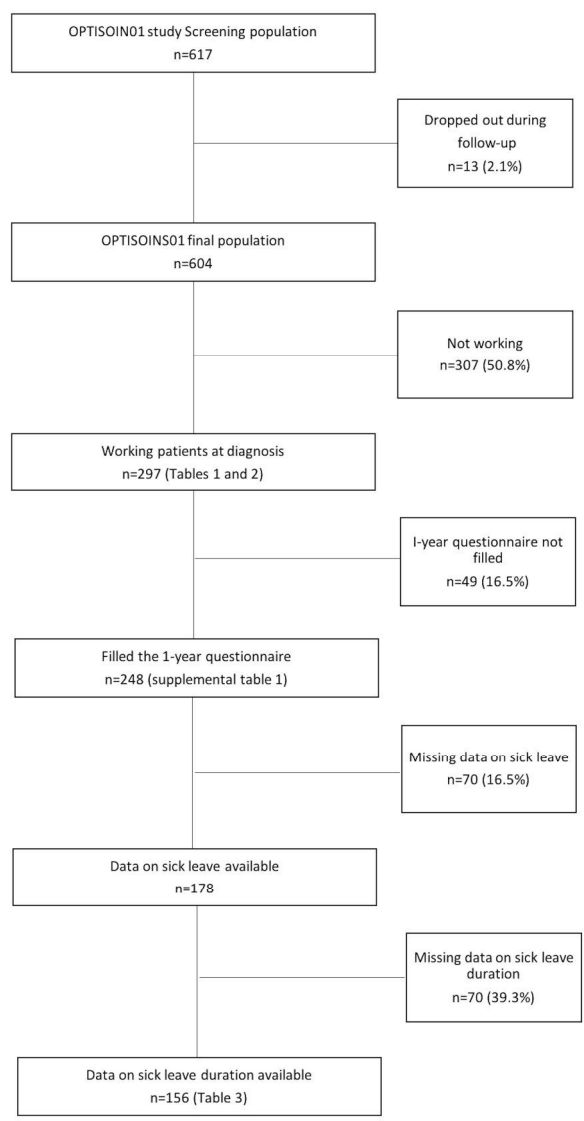

191x304mm (300 x 300 DPI)

Supplemental Table 1: Differences between patients who returned the 1-year questionnaire with data on sick leave (n=178) and no data on sick leave (n=70)

|                                      | Data on sick leave, n=178            |            | No data on sick leave, n=70 |            | p               |
|--------------------------------------|--------------------------------------|------------|-----------------------------|------------|-----------------|
|                                      | n or median                          | % or range | n or median                 | % or range |                 |
| <b>Patient characteristics</b>       |                                      |            |                             |            |                 |
| Age (years)                          | 50                                   | (29-67)    | 49                          | (27-77)    | 0.36            |
| Type of occupation                   |                                      |            |                             |            | <b>&lt;0.05</b> |
|                                      | <i>Farmer</i>                        | 1          | 1%                          | 0          | 0%              |
|                                      | <i>Self-employed</i>                 | 5          | 3%                          | 0          | 0%              |
|                                      | <i>Executive</i>                     | 72         | 40%                         | 3          | 4%              |
|                                      | <i>Employee</i>                      | 72         | 40%                         | 27         | 39%             |
|                                      | <i>Intermediate profession</i>       | 22         | 12%                         | 33         | 47%             |
|                                      | <i>Blue-collar worker</i>            | 2          | 1%                          | 7          | 10%             |
|                                      | <i>NA</i>                            | 4          | 2%                          | 0          | 0%              |
| Personal income per month (€)        |                                      |            |                             |            | <b>&lt;0.05</b> |
|                                      | <i>&lt;1900</i>                      | 71         | 40%                         | 20         | 29%             |
|                                      | <i>&gt;1900</i>                      | 103        | 58%                         | 37         | 53%             |
|                                      | <i>NA</i>                            | 4          | 2%                          | 13         | 19%             |
| Marital status                       |                                      |            |                             |            | <b>&lt;0.05</b> |
|                                      | <i>Single</i>                        | 34         | 19%                         | 18         | 26%             |
|                                      | <i>Married</i>                       | 110        | 62%                         | 39         | 56%             |
|                                      | <i>Divorced</i>                      | 29         | 16%                         | 10         | 14%             |
|                                      | <i>Widow</i>                         | 2          | 1%                          | 1          | 1%              |
|                                      | <i>NA</i>                            | 3          | 2%                          | 2          | 3%              |
| <b>Breast cancer characteristics</b> |                                      |            |                             |            |                 |
| Type of cancer                       |                                      |            |                             |            | 0.32            |
|                                      | <i>Invasive</i>                      | 156        | 87,6%                       | 61         | 87%             |
|                                      | <i>In situ</i>                       | 21         | 11,8%                       | 9          | 13%             |
| Lymph node involvement               |                                      |            |                             |            | 0.12            |
|                                      | <i>Yes</i>                           | 43         | 24%                         | 23         | 33%             |
|                                      | <i>No</i>                            | 135        | 76%                         | 47         | 67%             |
| <b>Surgical patient care</b>         |                                      |            |                             |            |                 |
| Breast surgery                       |                                      |            |                             |            | <b>&lt;0.05</b> |
|                                      | <i>Conservative</i>                  | 133        | 75%                         | 46         | 66%             |
|                                      | <i>Radical</i>                       | 45         | 25%                         | 24         | 34%             |
| Lymph node surgery                   |                                      |            |                             |            | 0.48            |
|                                      | <i>Sentinel lymph node procedure</i> | 122        | 69%                         | 40         | 57%             |
|                                      | <i>Axillary dissection</i>           | 42         | 24%                         | 24         | 34%             |

|                           |                             |     |     |    |     |       |
|---------------------------|-----------------------------|-----|-----|----|-----|-------|
|                           | NA                          | 14  | 8%  | 6  | 9%  |       |
| Surgical revision         |                             |     |     |    |     | 0.24  |
|                           | Yes                         | 43  | 24% | 16 | 23% |       |
|                           | No                          | 135 | 76% | 54 | 77% |       |
| Radiotherapy              |                             |     |     |    |     | <0.05 |
|                           | Yes                         | 167 | 94% | 61 | 87% |       |
|                           | No                          | 11  | 6%  | 9  | 13% |       |
| Chemotherapy              |                             |     |     |    |     | <0.05 |
|                           | Yes                         | 92  | 52% | 33 | 47% |       |
|                           | No                          | 86  | 48% | 37 | 53% |       |
| Trastuzumab               |                             |     |     |    |     | 0.42  |
|                           | Yes                         | 24  | 13% | 9  | 13% |       |
|                           | No                          | 63  | 35% | 22 | 31% |       |
|                           | NA                          | 91  | 51% | 39 | 56% |       |
| Hormone therapy           |                             |     |     |    |     | 0.69  |
|                           | Yes                         | 129 | 72% | 49 | 70% |       |
|                           | No                          | 49  | 28% | 21 | 30% |       |
| <b>Patient management</b> |                             |     |     |    |     |       |
| Modes of diagnosis        |                             |     |     |    |     | 0.45  |
|                           | <i>Organized screening</i>  | 37  | 21% | 12 | 17% |       |
|                           | <i>Individual screening</i> | 74  | 42% | 26 | 37% |       |
|                           | <i>Clinical signs</i>       | 67  | 38% | 32 | 46% |       |
| Type of hospitalization   |                             |     |     |    |     | 0.78  |
|                           | <i>Outpatient surgery</i>   | 108 | 61% | 43 | 61% |       |
|                           | <i>Inpatient surgery</i>    | 70  | 39% | 27 | 39% |       |

**STROBE 2007 (v4) Statement—Checklist of items that should be included in reports of cohort studies**

| Section/Topic             | Item # | Recommendation                                                                                                                                                                       | Reported on page # |
|---------------------------|--------|--------------------------------------------------------------------------------------------------------------------------------------------------------------------------------------|--------------------|
| Title and abstract        | 1      | (a) Indicate the study’s design with a commonly used term in the title or the abstract                                                                                               | 1                  |
|                           |        | (b) Provide in the abstract an informative and balanced summary of what was done and what was found                                                                                  | 4 and 5            |
| <b>Introduction</b>       |        |                                                                                                                                                                                      |                    |
| Background/rationale      | 2      | Explain the scientific background and rationale for the investigation being reported                                                                                                 | 7                  |
| Objectives                | 3      | State specific objectives, including any prespecified hypotheses                                                                                                                     | 7                  |
| <b>Methods</b>            |        |                                                                                                                                                                                      |                    |
| Study design              | 4      | Present key elements of study design early in the paper                                                                                                                              | 8                  |
| Setting                   | 5      | Describe the setting, locations, and relevant dates, including periods of recruitment, exposure, follow-up, and data collection                                                      | 8                  |
| Participants              | 6      | (a) Give the eligibility criteria, and the sources and methods of selection of participants. Describe methods of follow-up                                                           | 8                  |
|                           |        | (b) For matched studies, give matching criteria and number of exposed and unexposed                                                                                                  | 8                  |
| Variables                 | 7      | Clearly define all outcomes, exposures, predictors, potential confounders, and effect modifiers. Give diagnostic criteria, if applicable                                             | 9                  |
| Data sources/ measurement | 8*     | For each variable of interest, give sources of data and details of methods of assessment (measurement). Describe comparability of assessment methods if there is more than one group | 9                  |
| Bias                      | 9      | Describe any efforts to address potential sources of bias                                                                                                                            | 9                  |
| Study size                | 10     | Explain how the study size was arrived at                                                                                                                                            | 9                  |
| Quantitative variables    | 11     | Explain how quantitative variables were handled in the analyses. If applicable, describe which groupings were chosen and why                                                         | 9                  |
| Statistical methods       | 12     | (a) Describe all statistical methods, including those used to control for confounding                                                                                                | 9                  |
|                           |        | (b) Describe any methods used to examine subgroups and interactions                                                                                                                  | 9                  |
|                           |        | (c) Explain how missing data were addressed                                                                                                                                          | 9                  |
|                           |        | (d) If applicable, explain how loss to follow-up was addressed                                                                                                                       | 9                  |
|                           |        | (e) Describe any sensitivity analyses                                                                                                                                                | 9                  |
| <b>Results</b>            |        |                                                                                                                                                                                      | 9                  |

|                          |     |                                                                                                                                                                                                              |                       |
|--------------------------|-----|--------------------------------------------------------------------------------------------------------------------------------------------------------------------------------------------------------------|-----------------------|
| Participants             | 13* | (a) Report numbers of individuals at each stage of study—eg numbers potentially eligible, examined for eligibility, confirmed eligible, included in the study, completing follow-up, and analysed            | 9                     |
|                          |     | (b) Give reasons for non-participation at each stage                                                                                                                                                         | 10                    |
|                          |     | (c) Consider use of a flow diagram                                                                                                                                                                           | Supplemental figure 1 |
| Descriptive data         | 14* | (a) Give characteristics of study participants (eg demographic, clinical, social) and information on exposures and potential confounders                                                                     | 10 and 11             |
|                          |     | (b) Indicate number of participants with missing data for each variable of interest                                                                                                                          | 11                    |
|                          |     | (c) Summarise follow-up time (eg, average and total amount)                                                                                                                                                  | 11                    |
| Outcome data             | 15* | Report numbers of outcome events or summary measures over time                                                                                                                                               | 11                    |
| Main results             | 16  | (a) Give unadjusted estimates and, if applicable, confounder-adjusted estimates and their precision (eg, 95% confidence interval). Make clear which confounders were adjusted for and why they were included | 12-14                 |
|                          |     | (b) Report category boundaries when continuous variables were categorized                                                                                                                                    | 12-14                 |
|                          |     | (c) If relevant, consider translating estimates of relative risk into absolute risk for a meaningful time period                                                                                             | 12-14                 |
| Other analyses           | 17  | Report other analyses done—eg analyses of subgroups and interactions, and sensitivity analyses                                                                                                               | 13, 14                |
| <b>Discussion</b>        |     |                                                                                                                                                                                                              |                       |
| Key results              | 18  | Summarise key results with reference to study objectives                                                                                                                                                     | 16                    |
| <b>Limitations</b>       |     |                                                                                                                                                                                                              |                       |
| Interpretation           | 20  | Give a cautious overall interpretation of results considering objectives, limitations, multiplicity of analyses, results from similar studies, and other relevant evidence                                   | 16                    |
| Generalisability         | 21  | Discuss the generalisability (external validity) of the study results                                                                                                                                        | 17                    |
| <b>Other information</b> |     |                                                                                                                                                                                                              |                       |
| Funding                  | 22  | Give the source of funding and the role of the funders for the present study and, if applicable, for the original study on which the present article is based                                                | 23                    |

\*Give information separately for cases and controls in case-control studies and, if applicable, for exposed and unexposed groups in cohort and cross-sectional studies.

**Note:** An Explanation and Elaboration article discusses each checklist item and gives methodological background and published examples of transparent reporting. The STROBE checklist is best used in conjunction with this article (freely available on the Web sites of PLoS Medicine at <http://www.plosmedicine.org/>, Annals of Internal Medicine at <http://www.annals.org/>, and Epidemiology at <http://www.epidem.com/>). Information on the STROBE Initiative is available at [www.strobe-statement.org](http://www.strobe-statement.org).
