# Supplementary material for: Determinants of return at work of breast cancer patients: results from the OPTISOINS01 French prospective study
Source: PubMed Central journal article supplement — BMJ Open. 2018 May 18;8(5):e020276. doi: 10.1136/bmjopen-2017-020276 (PMC5961575; doi:10.1136/bmjopen-2017-020276), 2018-05-18
Supplement: bmjopen-2017-020276supp002.pdf [file bmjopen-2017-020276supp002.pdf]

Supplemental Table 1: Differences between patients who returned the 1-year questionnaire with data on sick leave (n=178) and no data on sick leave (n=70)

|                                      | Data on sick leave, n=178 |            | No data on sick leave, n=70 |            | p               |
|--------------------------------------|---------------------------|------------|-----------------------------|------------|-----------------|
|                                      | n or median               | % or range | n or median                 | % or range |                 |
| <b>Patient characteristics</b>       |                           |            |                             |            |                 |
| Age (years)                          | 50                        | (29-67)    | 49                          | (27-77)    | 0.36            |
| Type of occupation                   |                           |            |                             |            | <b>&lt;0.05</b> |
| <i>Farmer</i>                        | 1                         | 1%         | 0                           | 0%         |                 |
| <i>Self-employed</i>                 | 5                         | 3%         | 0                           | 0%         |                 |
| <i>Executive</i>                     | 72                        | 40%        | 3                           | 4%         |                 |
| <i>Employee</i>                      | 72                        | 40%        | 27                          | 39%        |                 |
| <i>Intermediate profession</i>       | 22                        | 12%        | 33                          | 47%        |                 |
| <i>Blue-collar worker</i>            | 2                         | 1%         | 7                           | 10%        |                 |
| NA                                   | 4                         | 2%         | 0                           | 0%         |                 |
| Personal income per month (€)        |                           |            |                             |            | <b>&lt;0.05</b> |
| <1900                                | 71                        | 40%        | 20                          | 29%        |                 |
| >1900                                | 103                       | 58%        | 37                          | 53%        |                 |
| NA                                   | 4                         | 2%         | 13                          | 19%        |                 |
| Marital status                       |                           |            |                             |            | <b>&lt;0.05</b> |
| <i>Single</i>                        | 34                        | 19%        | 18                          | 26%        |                 |
| <i>Married</i>                       | 110                       | 62%        | 39                          | 56%        |                 |
| <i>Divorced</i>                      | 29                        | 16%        | 10                          | 14%        |                 |
| <i>Widow</i>                         | 2                         | 1%         | 1                           | 1%         |                 |
| NA                                   | 3                         | 2%         | 2                           | 3%         |                 |
| <b>Breast cancer characteristics</b> |                           |            |                             |            |                 |
| Type of cancer                       |                           |            |                             |            | 0.32            |
| <i>Invasive</i>                      | 156                       | 87,6%      | 61                          | 87%        |                 |
| <i>In situ</i>                       | 21                        | 11,8%      | 9                           | 13%        |                 |
| Lymph node involvement               |                           |            |                             |            | 0.12            |
| <i>Yes</i>                           | 43                        | 24%        | 23                          | 33%        |                 |
| <i>No</i>                            | 135                       | 76%        | 47                          | 67%        |                 |
| <b>Surgical patient care</b>         |                           |            |                             |            |                 |
| Breast surgery                       |                           |            |                             |            | <b>&lt;0.05</b> |
| <i>Conservative</i>                  | 133                       | 75%        | 46                          | 66%        |                 |
| <i>Radical</i>                       | 45                        | 25%        | 24                          | 34%        |                 |
| Lymph node surgery                   |                           |            |                             |            | 0.48            |
| <i>Sentinel lymph node procedure</i> | 122                       | 69%        | 40                          | 57%        |                 |
| <i>Axillary dissection</i>           | 42                        | 24%        | 24                          | 34%        |                 |

|                           |                             |     |     |    |     |       |
|---------------------------|-----------------------------|-----|-----|----|-----|-------|
|                           | <i>NA</i>                   | 14  | 8%  | 6  | 9%  |       |
| Surgical revision         |                             |     |     |    |     | 0.24  |
|                           | <i>Yes</i>                  | 43  | 24% | 16 | 23% |       |
|                           | <i>No</i>                   | 135 | 76% | 54 | 77% |       |
| Radiotherapy              |                             |     |     |    |     | <0.05 |
|                           | <i>Yes</i>                  | 167 | 94% | 61 | 87% |       |
|                           | <i>No</i>                   | 11  | 6%  | 9  | 13% |       |
| Chemotherapy              |                             |     |     |    |     | <0.05 |
|                           | <i>Yes</i>                  | 92  | 52% | 33 | 47% |       |
|                           | <i>No</i>                   | 86  | 48% | 37 | 53% |       |
| Trastuzumab               |                             |     |     |    |     | 0.42  |
|                           | <i>Yes</i>                  | 24  | 13% | 9  | 13% |       |
|                           | <i>No</i>                   | 63  | 35% | 22 | 31% |       |
|                           | <i>NA</i>                   | 91  | 51% | 39 | 56% |       |
| Hormone therapy           |                             |     |     |    |     | 0.69  |
|                           | <i>Yes</i>                  | 129 | 72% | 49 | 70% |       |
|                           | <i>No</i>                   | 49  | 28% | 21 | 30% |       |
| <b>Patient management</b> |                             |     |     |    |     |       |
| Modes of diagnosis        |                             |     |     |    |     | 0.45  |
|                           | <i>Organized screening</i>  | 37  | 21% | 12 | 17% |       |
|                           | <i>Individual screening</i> | 74  | 42% | 26 | 37% |       |
|                           | <i>Clinical signs</i>       | 67  | 38% | 32 | 46% |       |
| Type of hospitalization   |                             |     |     |    |     | 0.78  |
|                           | <i>Outpatient surgery</i>   | 108 | 61% | 43 | 61% |       |
|                           | <i>Inpatient surgery</i>    | 70  | 39% | 27 | 39% |       |

---
